# Supplementary material for: Ochraceopetalin, a Mixed-Biogenetic Salt of Polyketide and Amino Acid Origins from a Marine-Derived Aspergillus ochraceopetaliformis Fungus
Source: MDPI journal article supplement (doi:10.3390/md19080413), 2021-07-26
Supplement: s1 [file s1]

# **Ochraceopetalin, a Mixed-Biogenetic Salt of Polyketide and Amino Acid Origins from a Marine-Derived *Aspergillus ochraceopetaliformis* Fungus**

**Sung Chul Park <sup>1,†</sup>, Jung-Ho Lee <sup>1,†</sup>, Ji-Yeon Hwang <sup>1</sup>, Oh-Seok Kwon <sup>1</sup>, Lijuan Liao <sup>1,2</sup>, Dong-Chan Oh <sup>1</sup>, Ki-Bong Oh <sup>3,\*</sup> and Jongheon Shin <sup>1,\*</sup>**

<sup>1</sup> Natural Products Research Institute, College of Pharmacy, Seoul National University, San 56-1, Sillim, Gwanak, Seoul 151-742, Korea; sungchulpark@snu.ac.kr (S.C.P.); anilove@snu.ac.kr (J.-H..L.); yahyah7@snu.ac.kr (J.-Y.H.); ideally225@snu.ac.kr (O.-S.K.); lxyxf@snu.ac.kr (L.L.); dongchanoh@snu.ac.kr (D.-C.O.); shinj@snu.ac.kr (J.S.)

<sup>2</sup> College of Life Sciences, Fujian Agriculture and Forestry University, Fuzhou 350002, China; lxyxf@snu.ac.kr (L.L.)

<sup>3</sup> Department of Agricultural Biotechnology, College of Agriculture and Life Science, Seoul National University, San 56-1, Sillim, Gwanak, Seoul 151-921, Korea; ohkibong@snu.ac.kr (K.-B.O.)

\* Correspondence: shinj@snu.ac.kr (J.S.); ohkibong@snu.ac.kr (K.-B.O.); Tel.: +82-2-880-2484 (J.S.); +82-2-880-4646 (K.-B.O.)

† Equal contribution.

## Contents

|                                                                                                                             |     |
|-----------------------------------------------------------------------------------------------------------------------------|-----|
| <b>Figure S1.</b> The $^1\text{H}$ NMR (500 MHz, DMSO- $d_6$ ) spectrum of <b>1</b>                                         | S3  |
| <b>Figure S2.</b> The $^{13}\text{C}$ NMR (125 MHz, DMSO- $d_6$ ) spectrum of <b>1</b>                                      | S4  |
| <b>Figure S3.</b> The COSY (500 MHz, DMSO- $d_6$ ) spectrum of <b>1</b>                                                     | S5  |
| <b>Figure S4.</b> The HSQC (500 MHz, DMSO- $d_6$ ) spectrum of <b>1</b>                                                     | S6  |
| <b>Figure S5.</b> The HMBC (500 MHz, DMSO- $d_6$ ) spectrum of <b>1</b>                                                     | S7  |
| <b>Figure S6.</b> HR-ESI-MS data of <b>1</b>                                                                                | S8  |
| <b>Figure S7.</b> The $^1\text{H}$ NMR (600 MHz, DMSO- $d_6$ ) spectrum of <b>2</b>                                         | S9  |
| <b>Figure S8.</b> The $^{13}\text{C}$ NMR (150 MHz, DMSO- $d_6$ ) spectrum of <b>2</b>                                      | S10 |
| <b>Figure S9.</b> The COSY (600 MHz, DMSO- $d_6$ ) spectrum of <b>2</b>                                                     | S11 |
| <b>Figure S10.</b> The HSQC (600 MHz, DMSO- $d_6$ ) spectrum of <b>2</b>                                                    | S12 |
| <b>Figure S11.</b> The HMBC (600 MHz, DMSO- $d_6$ ) spectrum of <b>2</b>                                                    | S13 |
| <b>Figure S12.</b> The $^1\text{H}$ NMR (600 MHz, DMSO- $d_6$ ) spectrum of <b>3</b>                                        | S14 |
| <b>Figure S13.</b> The $^{13}\text{C}$ NMR (150 MHz, DMSO- $d_6$ ) spectrum of <b>3</b>                                     | S15 |
| <b>Figure S14.</b> The COSY (600 MHz, DMSO- $d_6$ ) spectrum of <b>3</b>                                                    | S16 |
| <b>Figure S15.</b> The HSQC (600 MHz, DMSO- $d_6$ ) spectrum of <b>3</b>                                                    | S17 |
| <b>Figure S16.</b> The HMBC (600 MHz, DMSO- $d_6$ ) spectrum of <b>3</b>                                                    | S18 |
| <b>Figure S17.</b> The $^1\text{H}$ NMR (400 MHz, $\text{CDCl}_3$ ) spectrum of <b>4</b>                                    | S19 |
| <b>Figure S18.</b> The $^{13}\text{C}$ NMR (100 MHz, $\text{CDCl}_3$ ) spectrum of <b>4</b>                                 | S20 |
| <b>Figure S19.</b> The $^1\text{H}$ NMR (400 MHz, DMSO- $d_6$ ) spectrum of <b>3a</b>                                       | S21 |
| <b>Figure S20.</b> The $^1\text{H}$ NMR (400 MHz, $\text{CDCl}_3$ ) spectrum of <b>3b</b>                                   | S22 |
| <b>Figure S21.</b> The $^1\text{H}$ NMR (800 MHz, Methanol- $d_4$ ) spectrum of <b>3aS</b>                                  | S23 |
| <b>Figure S22.</b> The $^1\text{H}$ NMR (800 MHz, Methanol- $d_4$ ) spectrum of <b>3aR</b>                                  | S24 |
| <b>Figure S23.</b> The LC/MS chromatogram data of <b>3b-L-FDAA</b> adduct                                                   | S25 |
| <b>Figure S24.</b> The time-scale LC-MS analysis of YMM liquid media extracts                                               | S25 |
| <b>Figure S25.</b> The time-scale LC-MS analysis of YMM-rice semi-solid media extracts                                      | S26 |
| <b>Figure S26.</b> The MTT assay against K562 and A549 cancer cells                                                         | S27 |
| <b>Table S1.</b> Results of cytotoxicity tests                                                                              | S27 |
| <b>Figure S27.</b> The $^{13}\text{C}$ NMR (25 MHz, $\text{D}_2\text{O}$ ) spectra of guanidine and guanidine hydrochloride | S28 |
| <b>Figure S28.</b> The HPLC analysis of <b>1</b>                                                                            | S29 |
| <b>Figure S29.</b> The $^{13}\text{C}$ NMR (100 MHz, DMSO- $d_6$ ) spectrum of <b>3c</b>                                    | S30 |
| <b>Figure S30.</b> The $^{13}\text{C}$ NMR (125 MHz, MeOH- $d_4$ ) spectrum of <b>1</b>                                     | S31 |
| <b>Figure S31.</b> The $^{13}\text{C}$ NMR (200 MHz, MeOH- $d_4$ ) spectrum of <b>3</b>                                     | S32 |
| <b>Table S2.</b> The $^{13}\text{C}$ NMR data of <b>1–3</b> and <b>3c</b>                                                   | S33 |

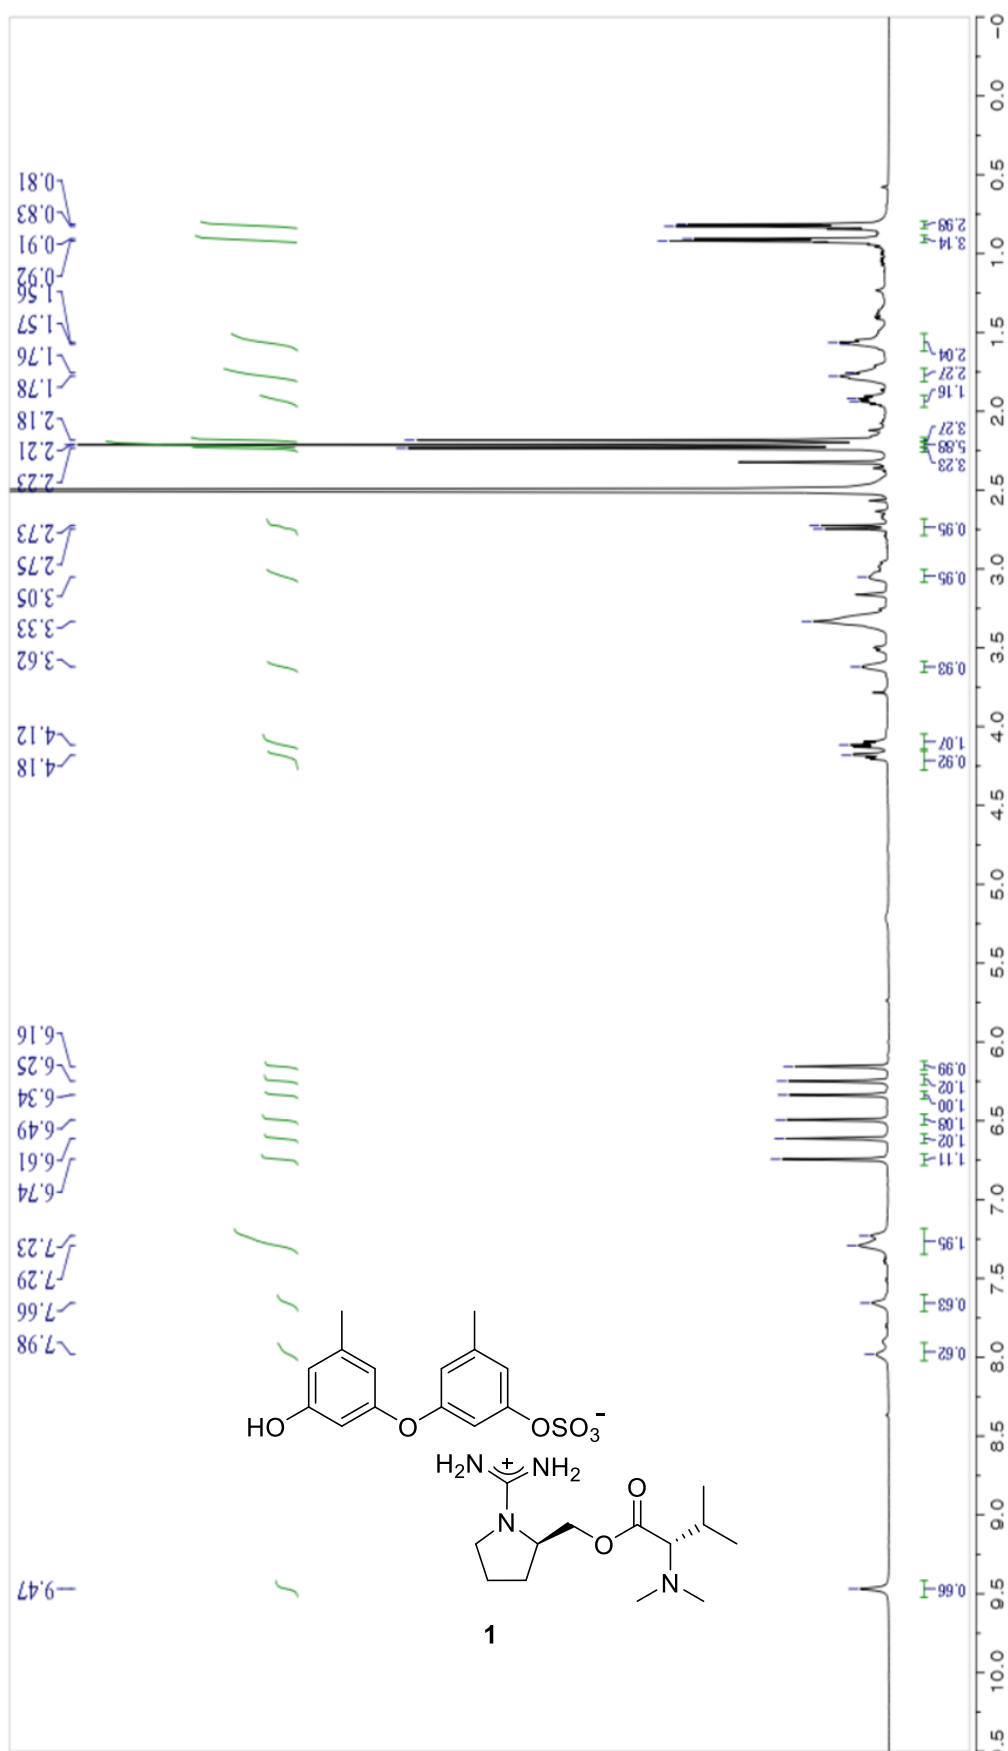

**Figure S1.** The  $^1\text{H}$  NMR (500 MHz,  $\text{DMSO}-d_6$ ) spectrum of **1**

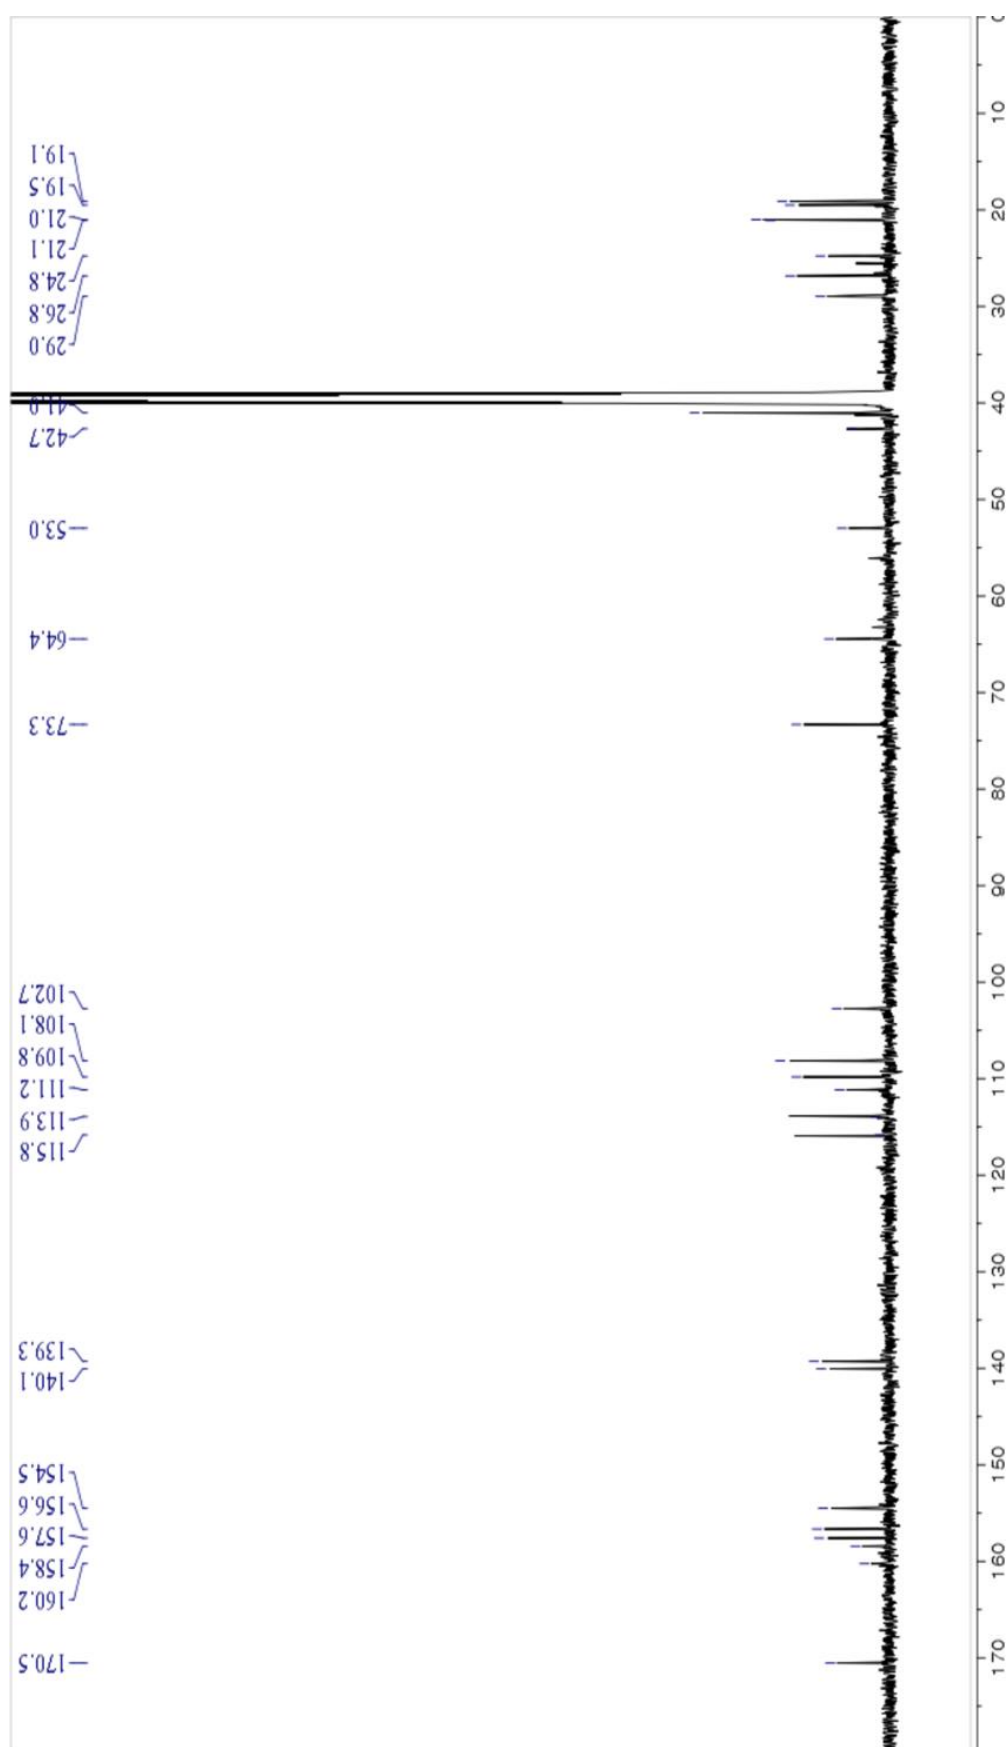

**Figure S2.** The <sup>13</sup>C NMR (125 MHz, DMSO-*d*<sub>6</sub>) spectrum of **1**

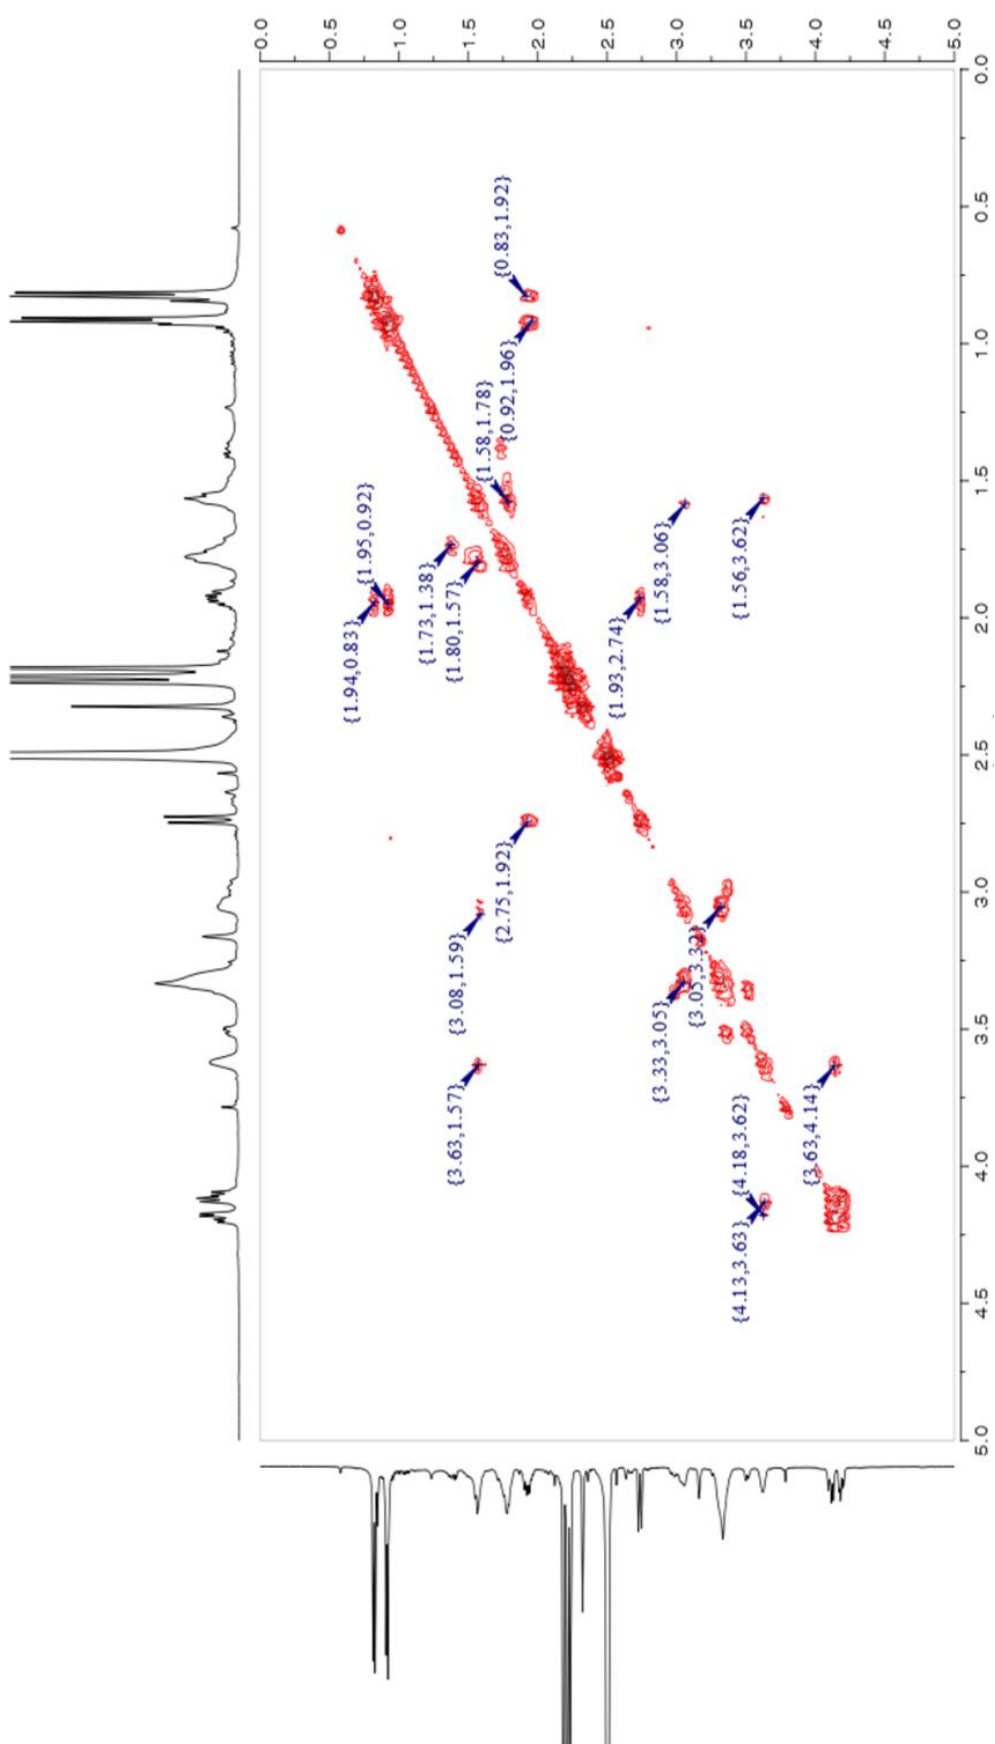

**Figure S3.** The COSY (500 MHz,  $\text{DMSO-}d_6$ ) spectrum of **1**

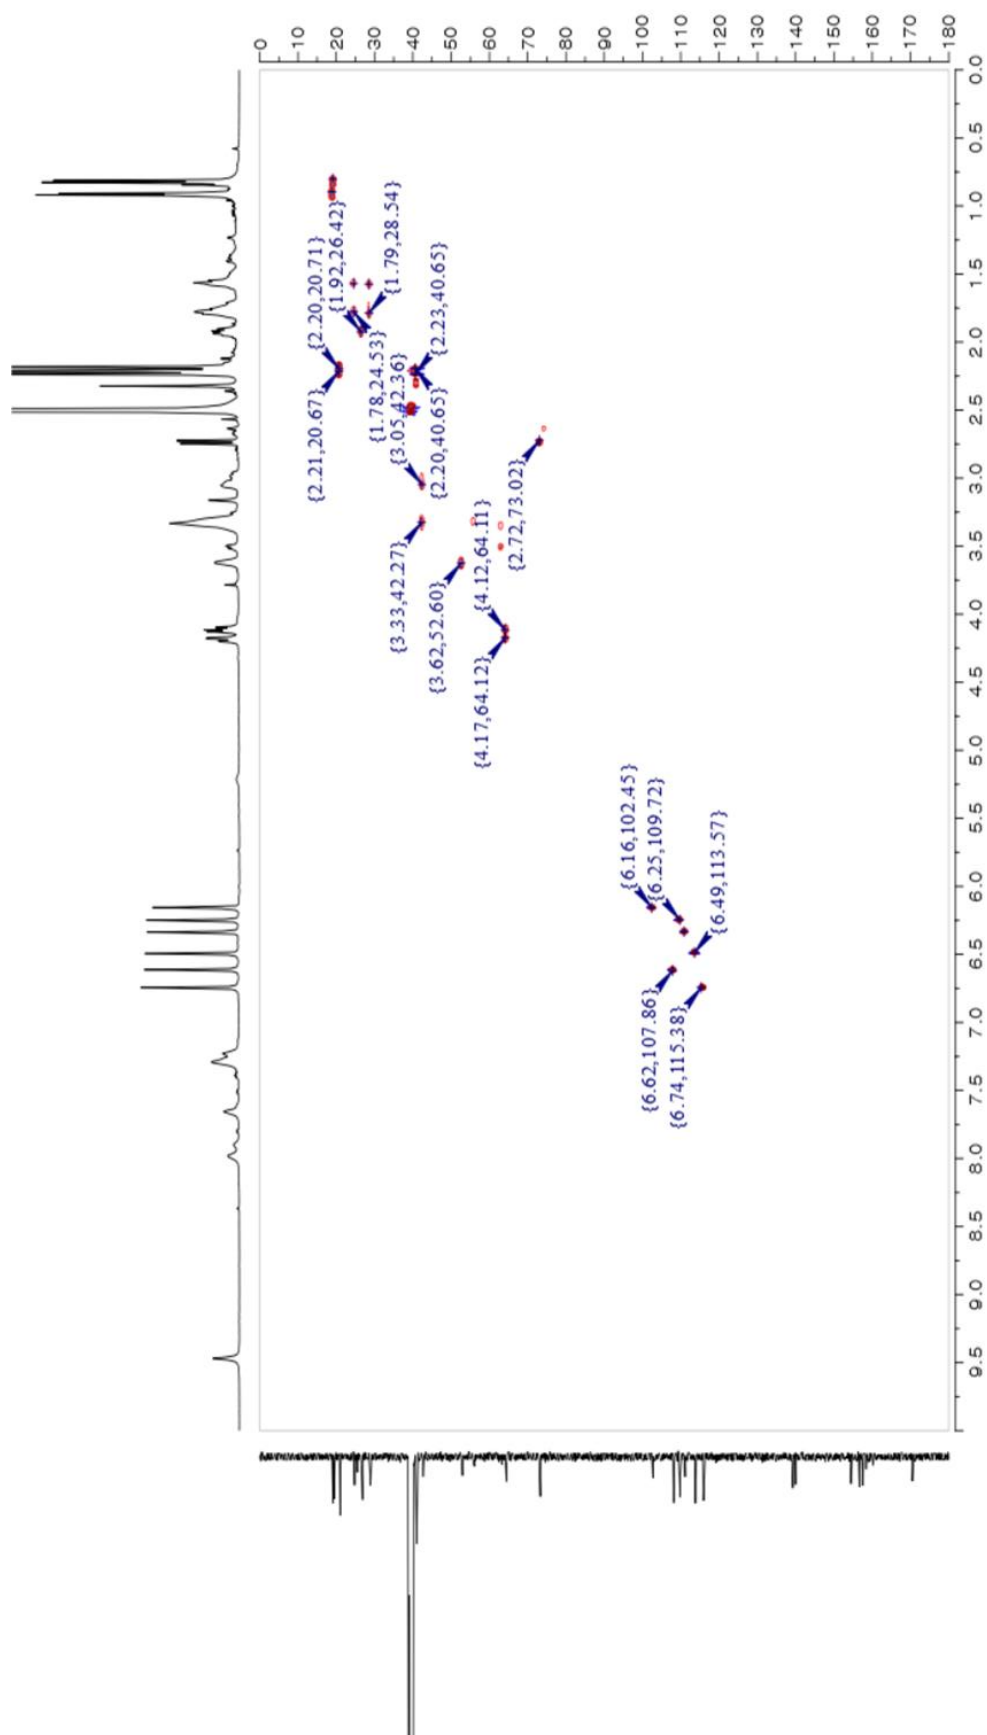

**Figure S4.** The HSQC (500 MHz, DMSO-*d*<sub>6</sub>) spectrum of **1**

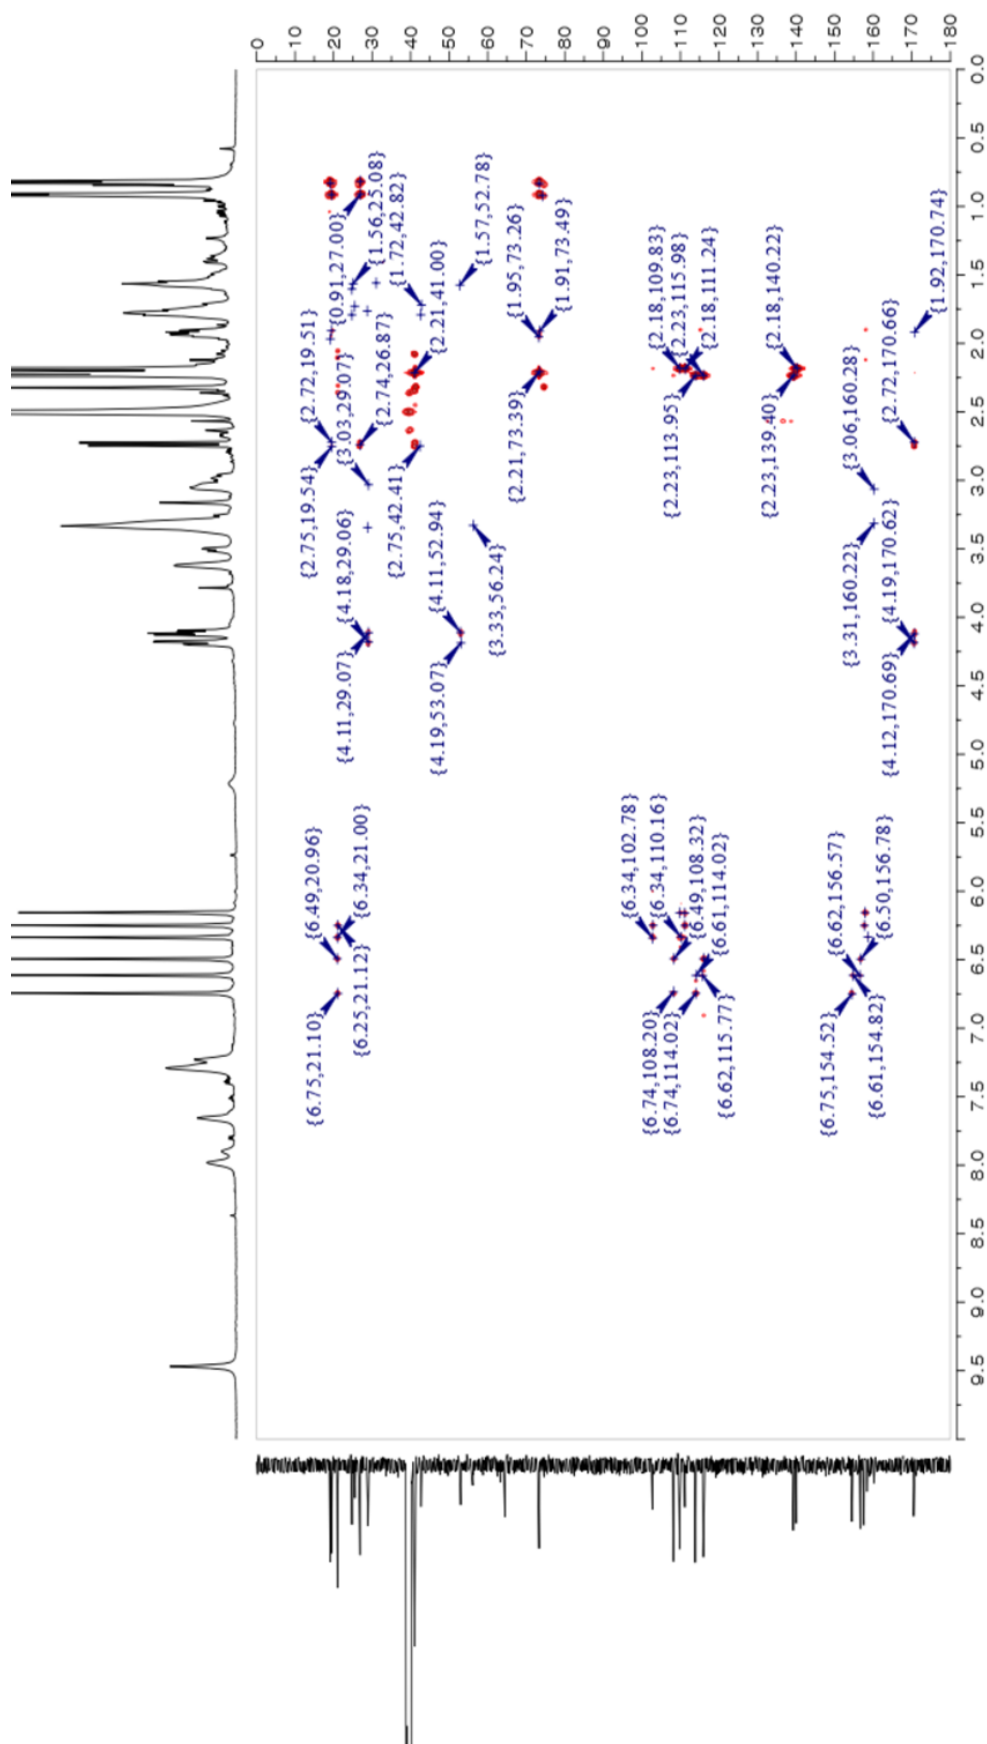

**Figure S5.** The HMBC (500 MHz, DMSO- $d_6$ ) spectrum of **1**

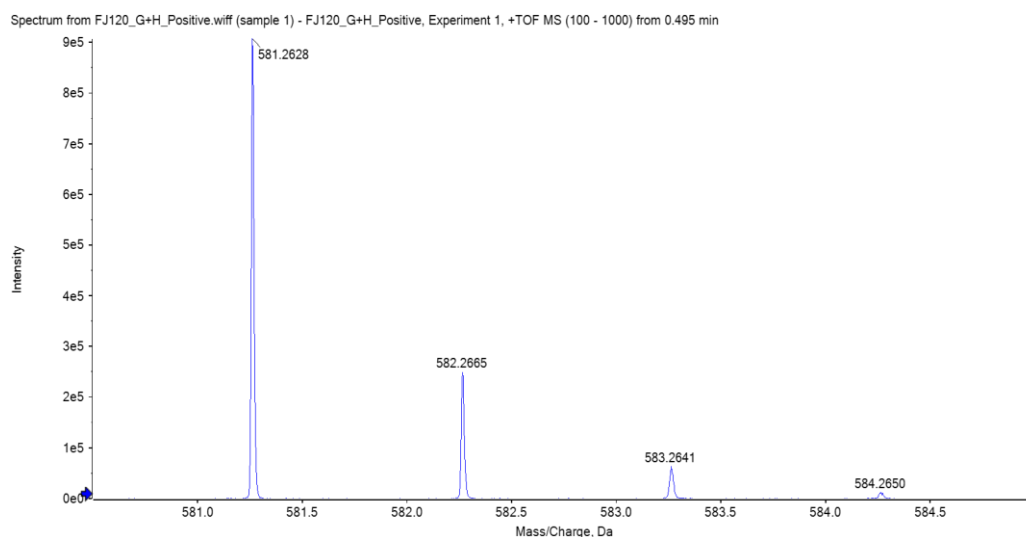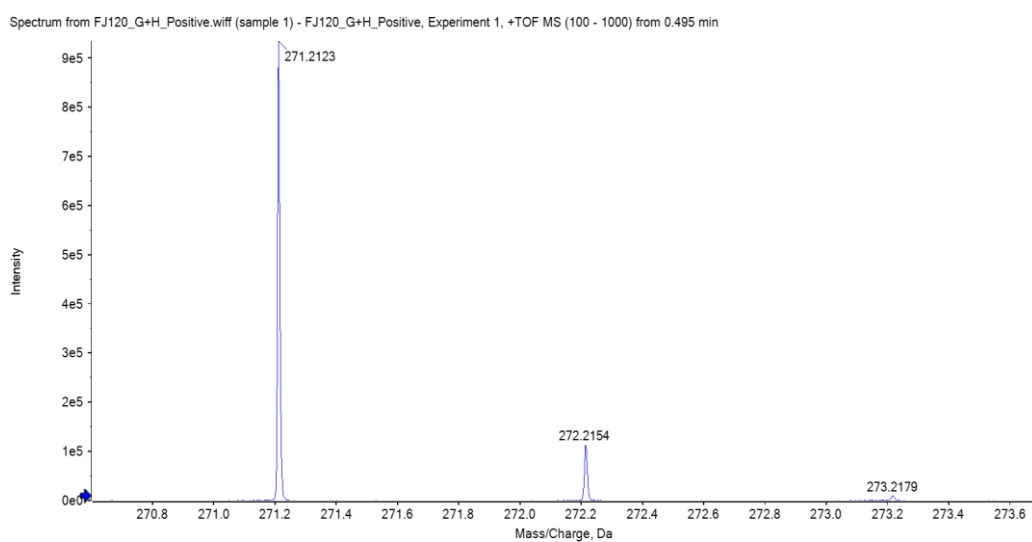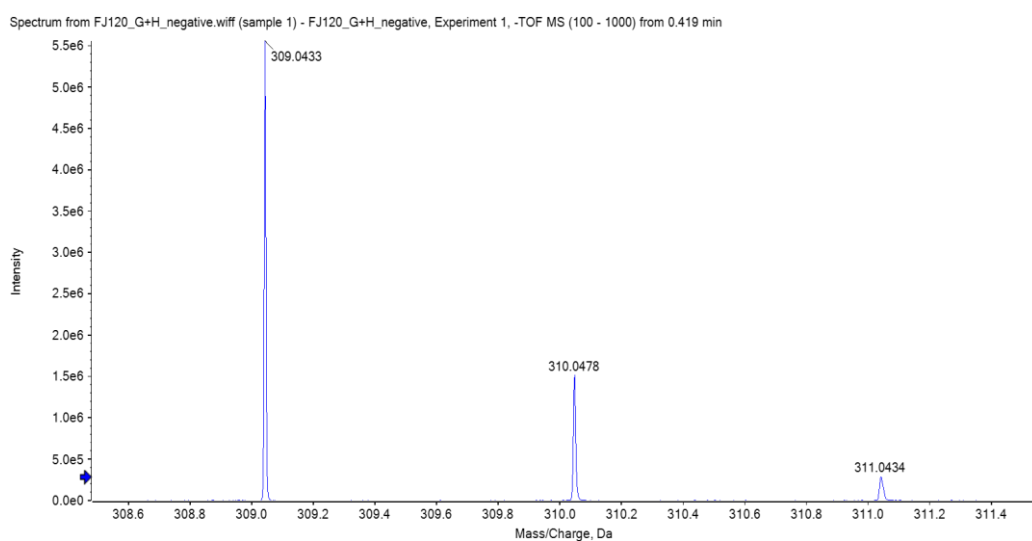

**Figure S6. HR-ESI-MS data of 1**



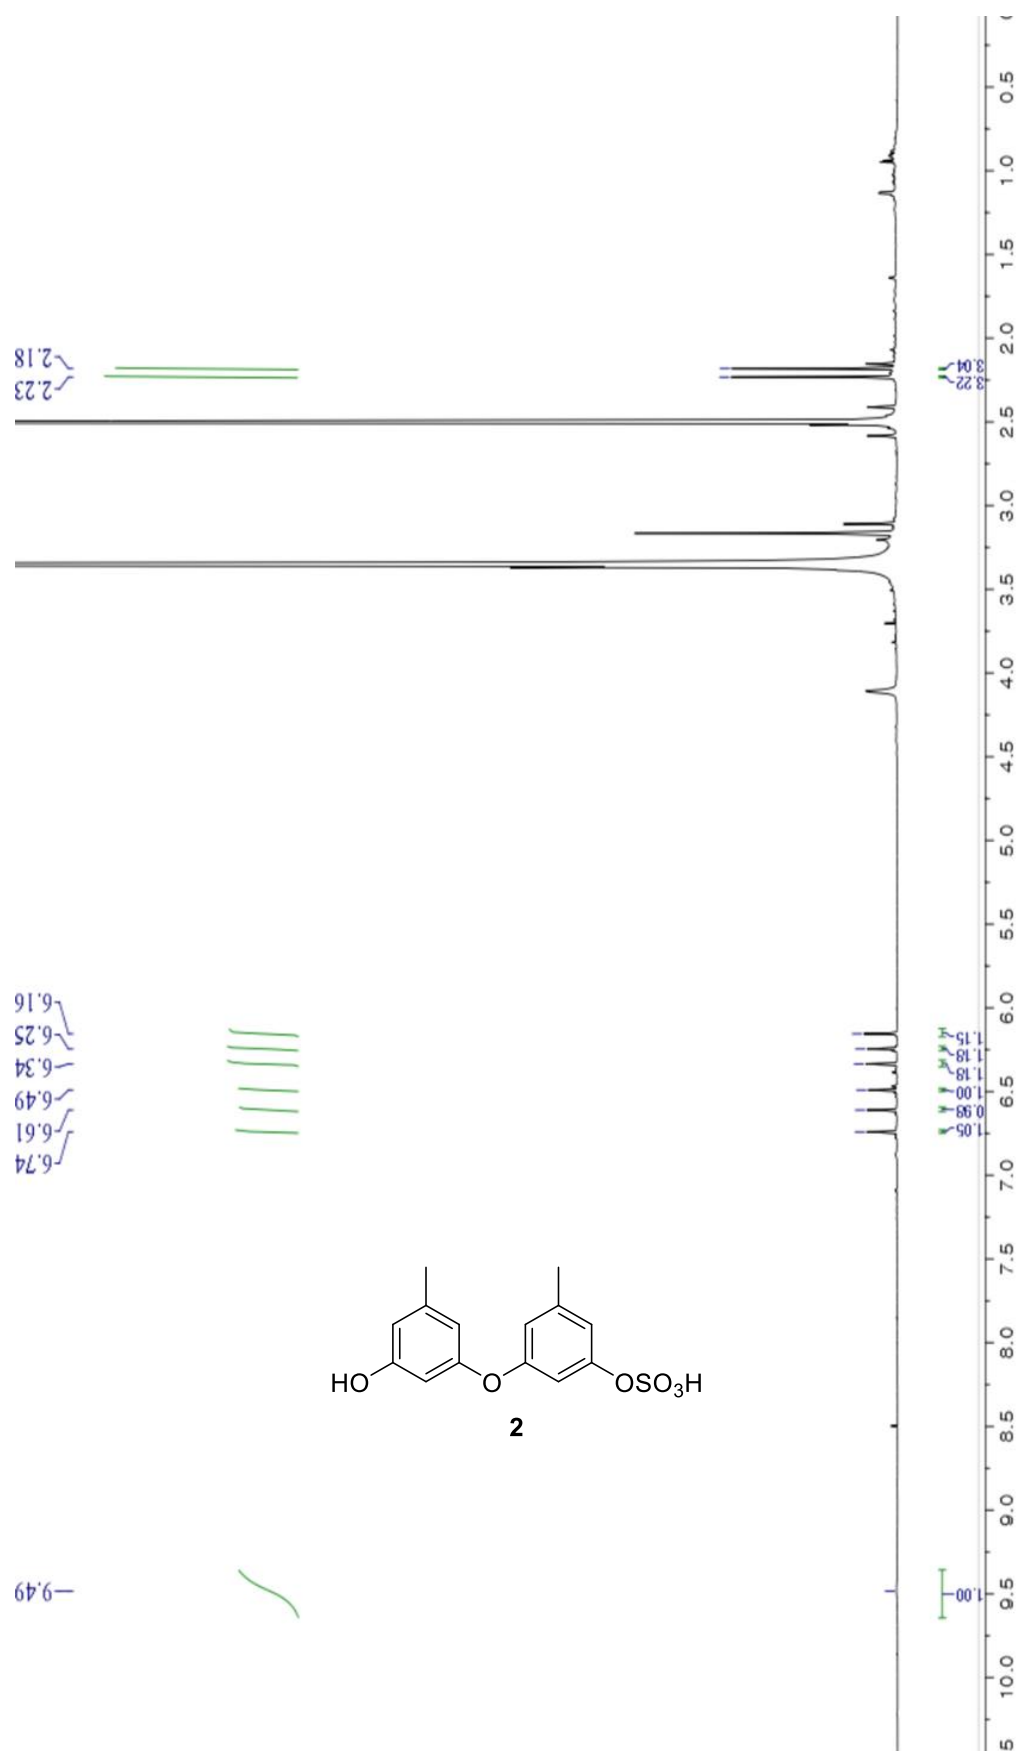

**Figure S7.** The <sup>1</sup>H NMR (600 MHz, DMSO- *d*<sub>6</sub>) spectrum of **2**

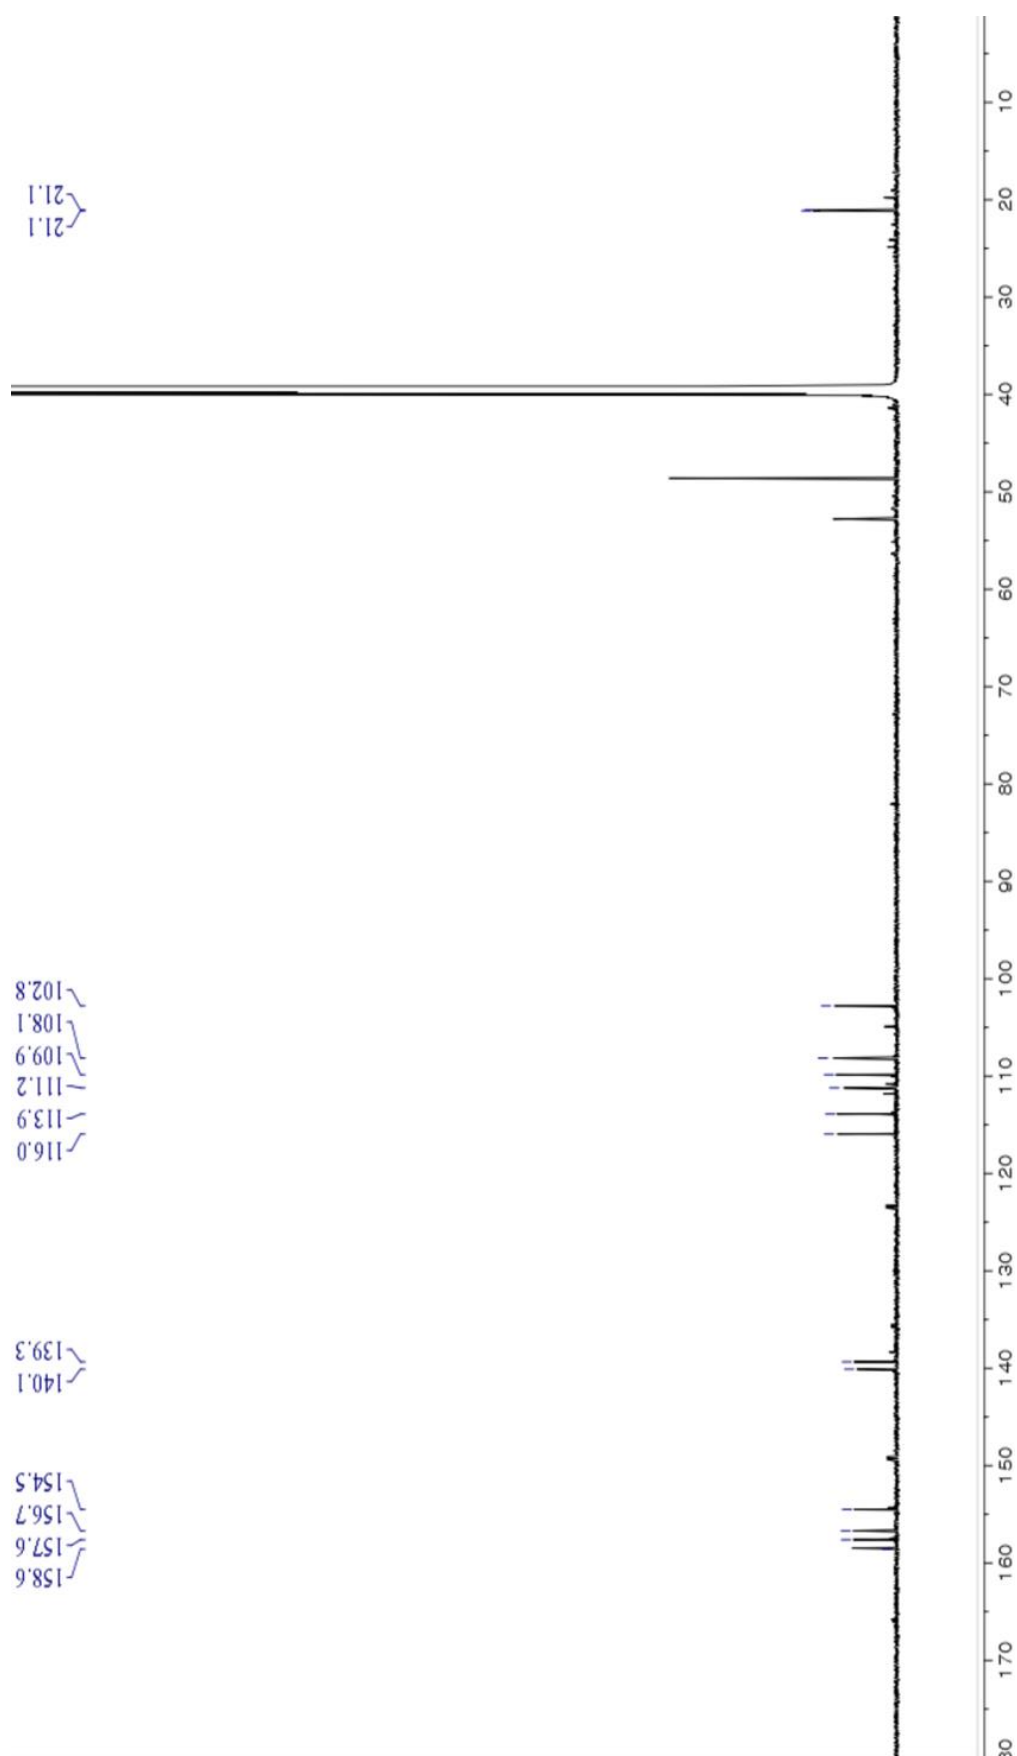

**Figure S8.** The  $^{13}\text{C}$  NMR (150 MHz,  $\text{DMSO}-d_6$ ) spectrum of **2**

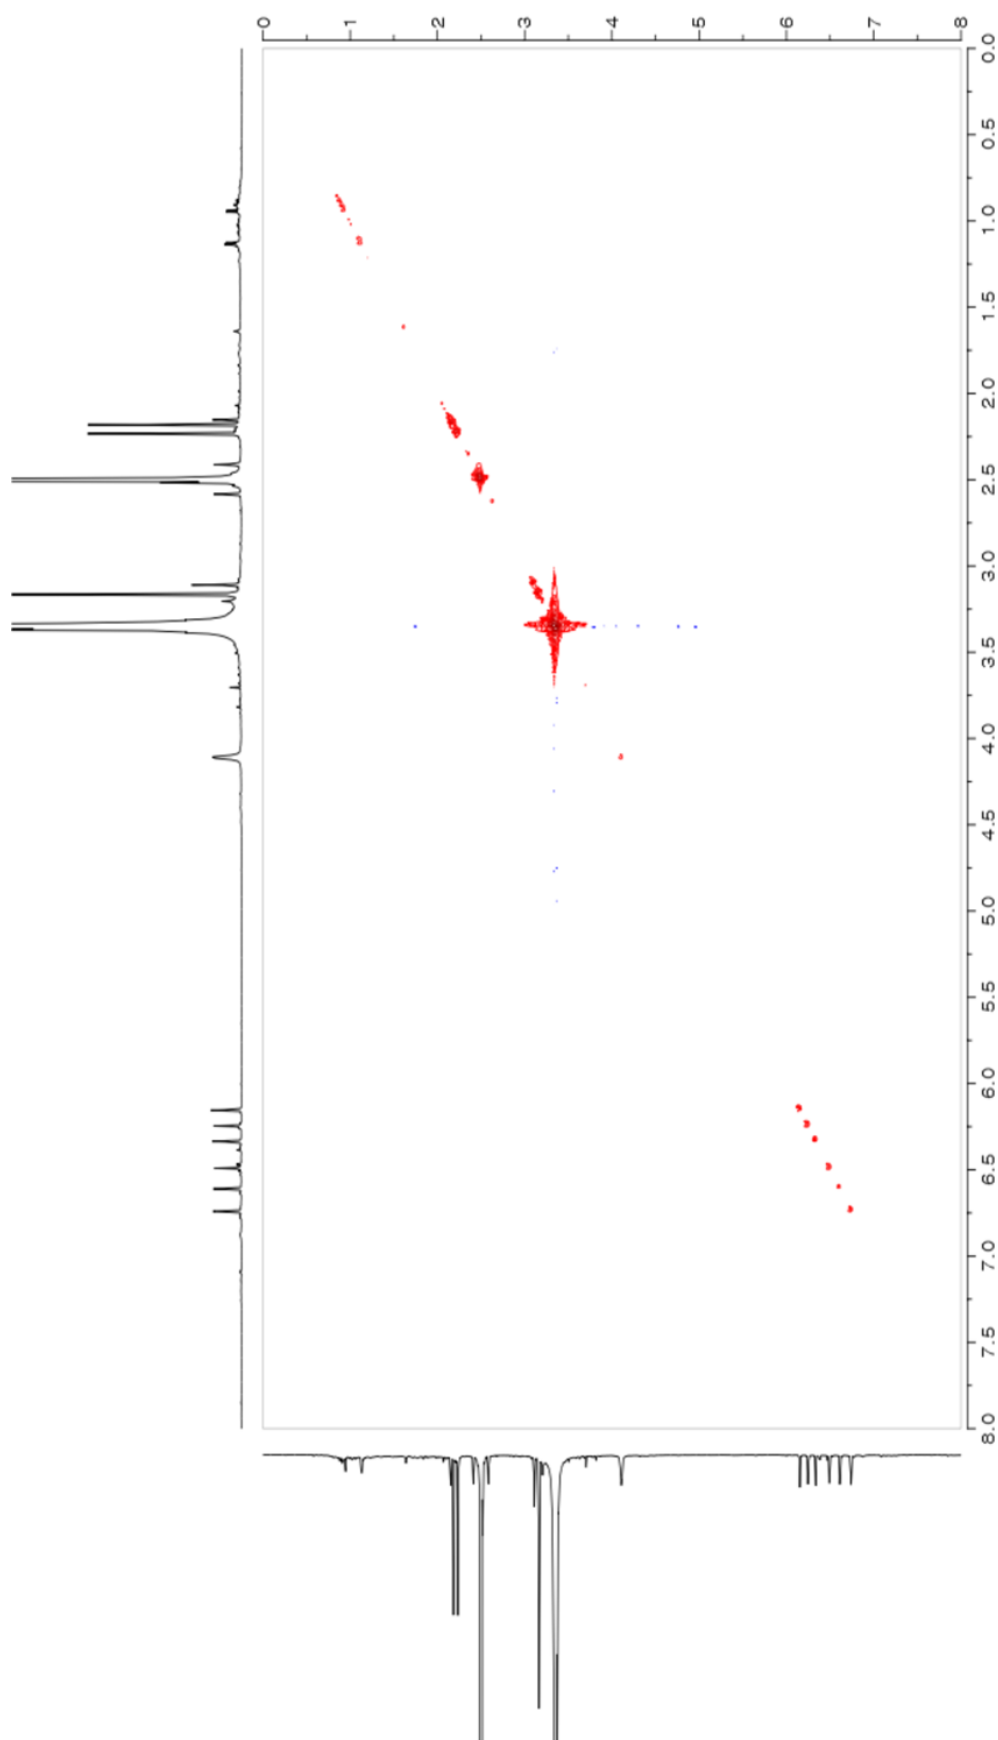

**Figure S9.** The COSY (600 MHz, DMSO-  $d_6$ ) spectrum of **2**

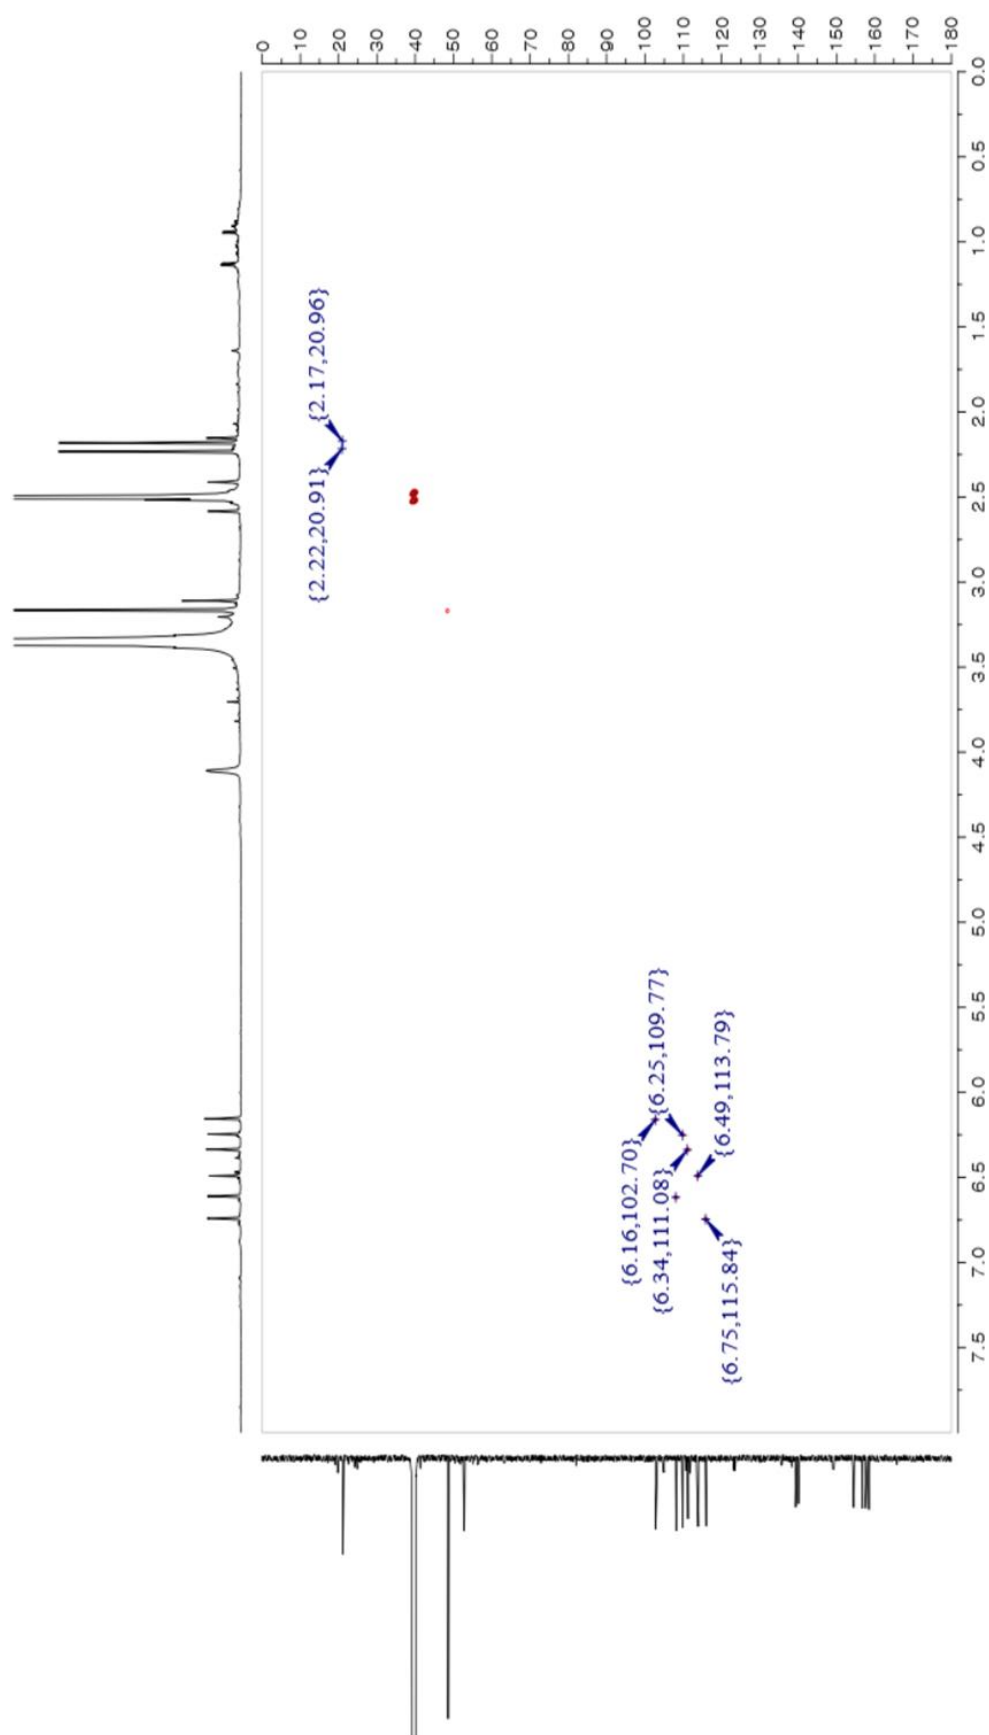

**Figure S10.** The HSQC (600 MHz, DMSO-  $d_6$ ) spectrum of **2**

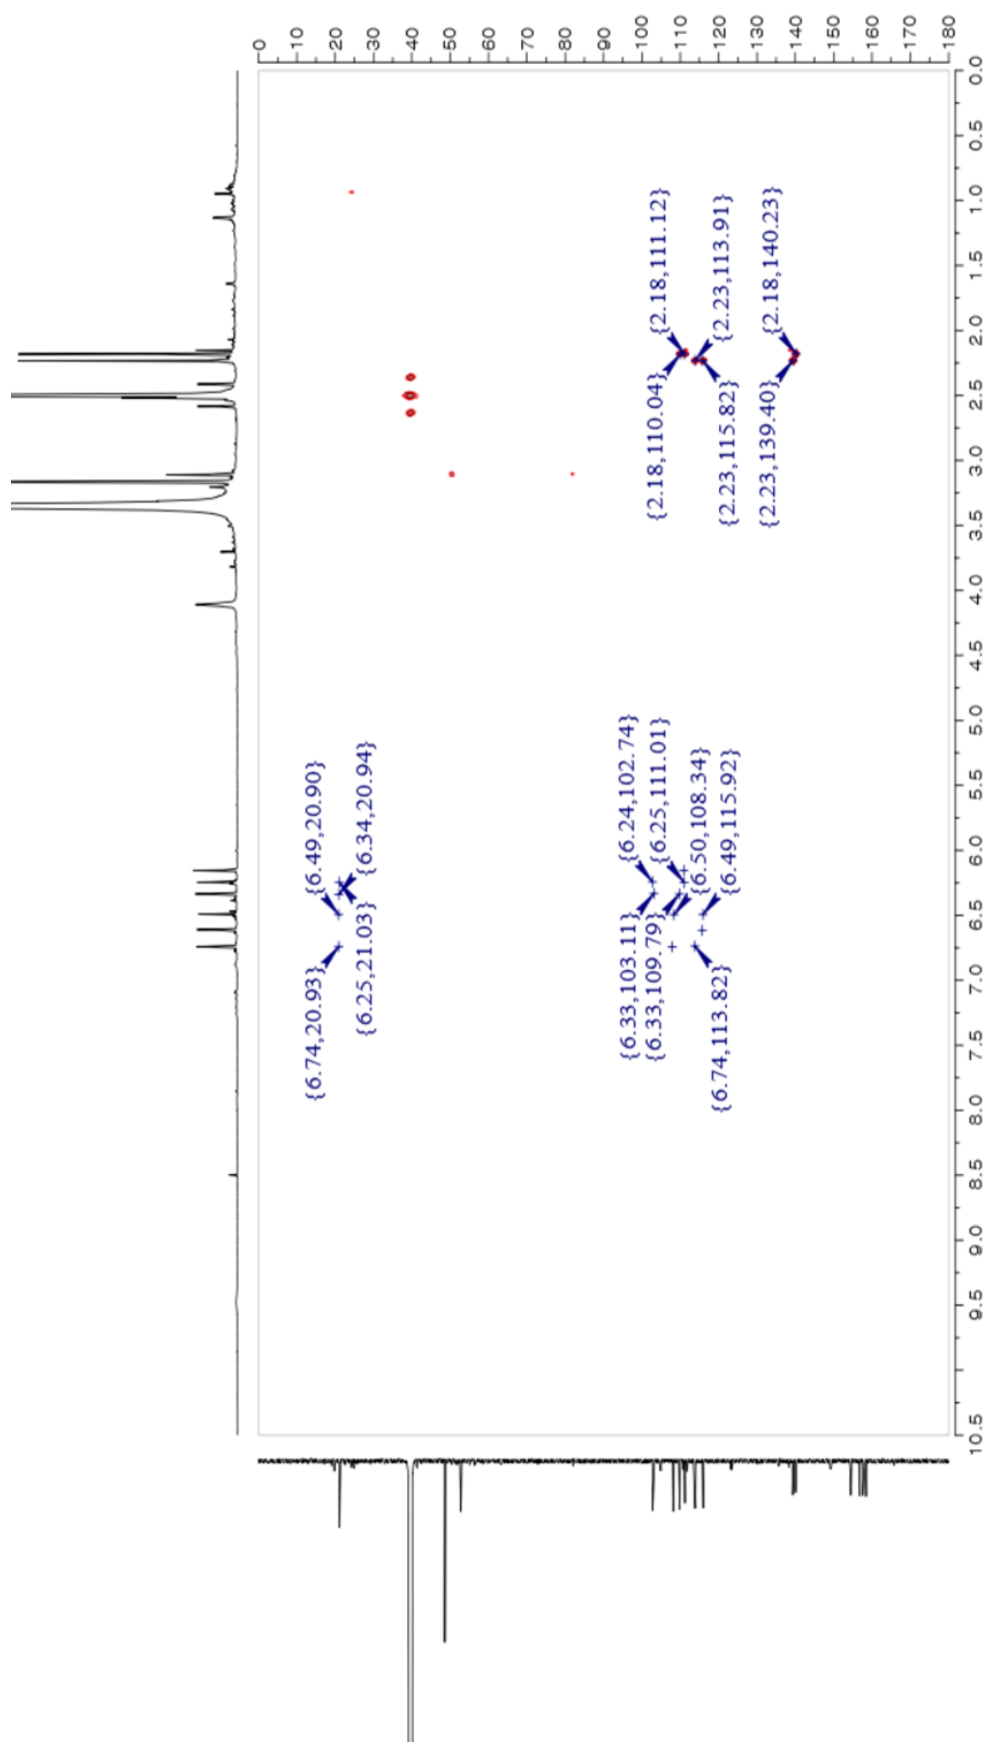

**Figure S11.** The HMBC (600 MHz, DMSO- $d_6$ ) spectrum of **2**

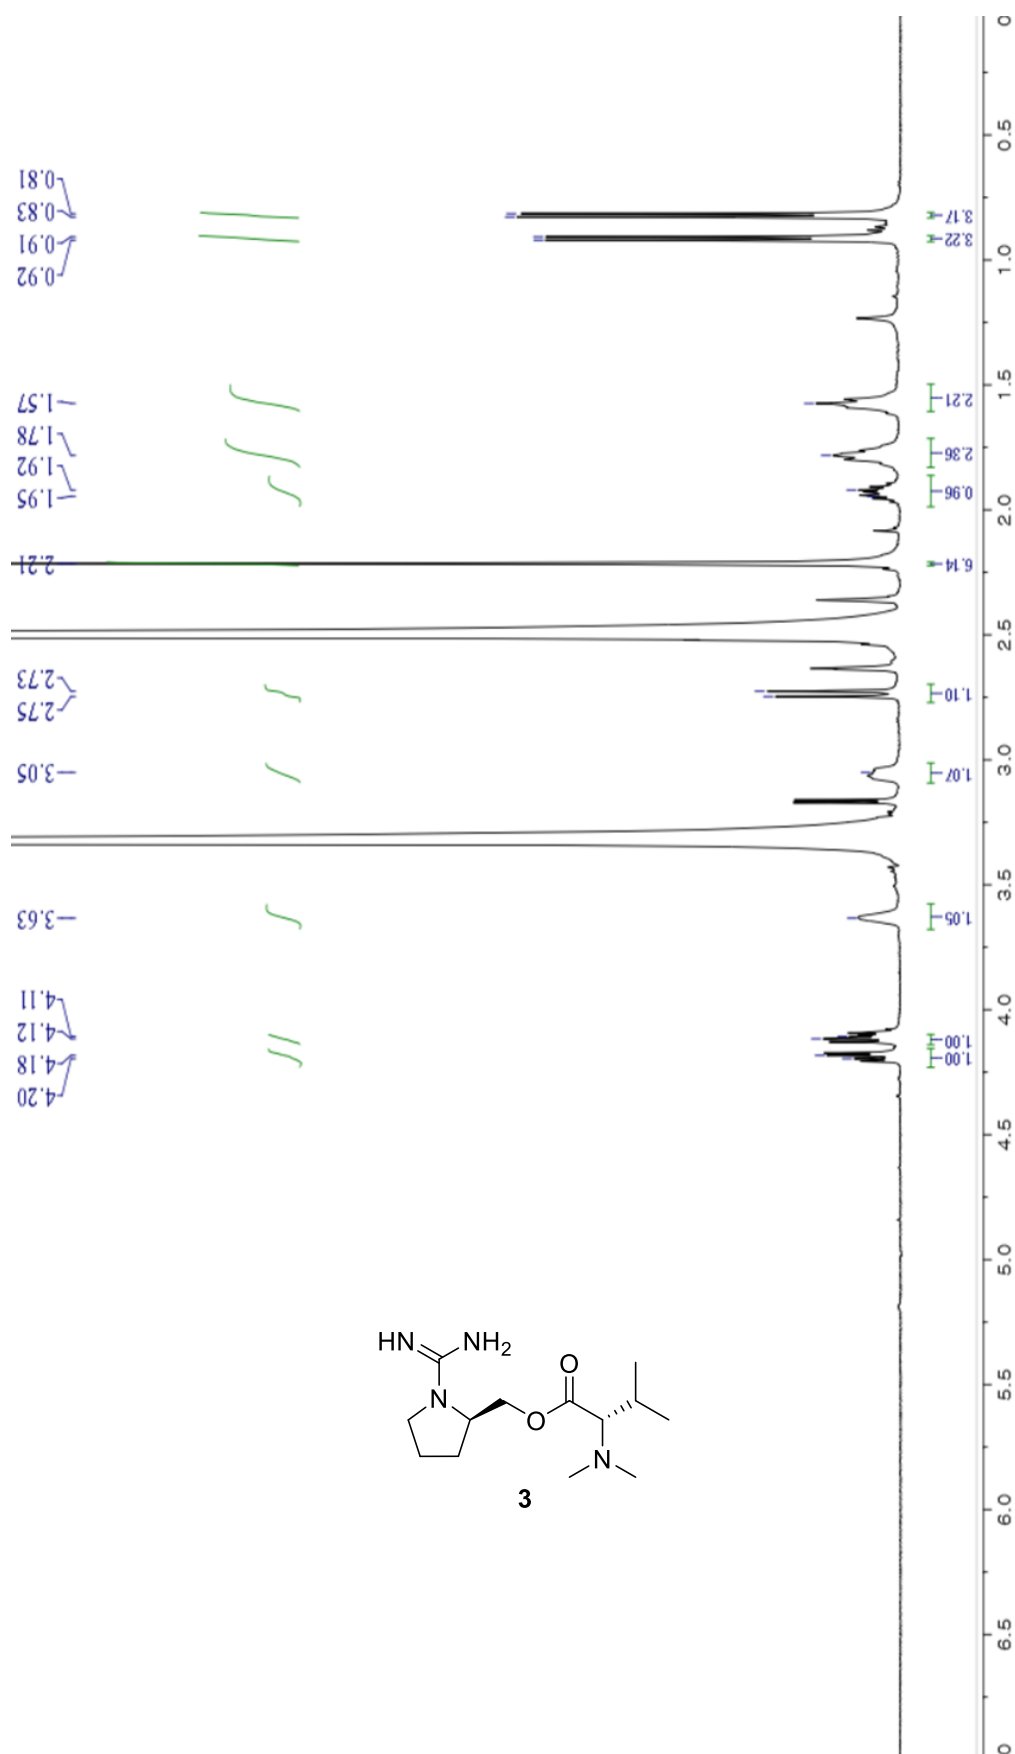

**Figure S12.** The  $^1\text{H}$  NMR (600 MHz,  $\text{DMSO-}d_6$ ) spectrum of **3**

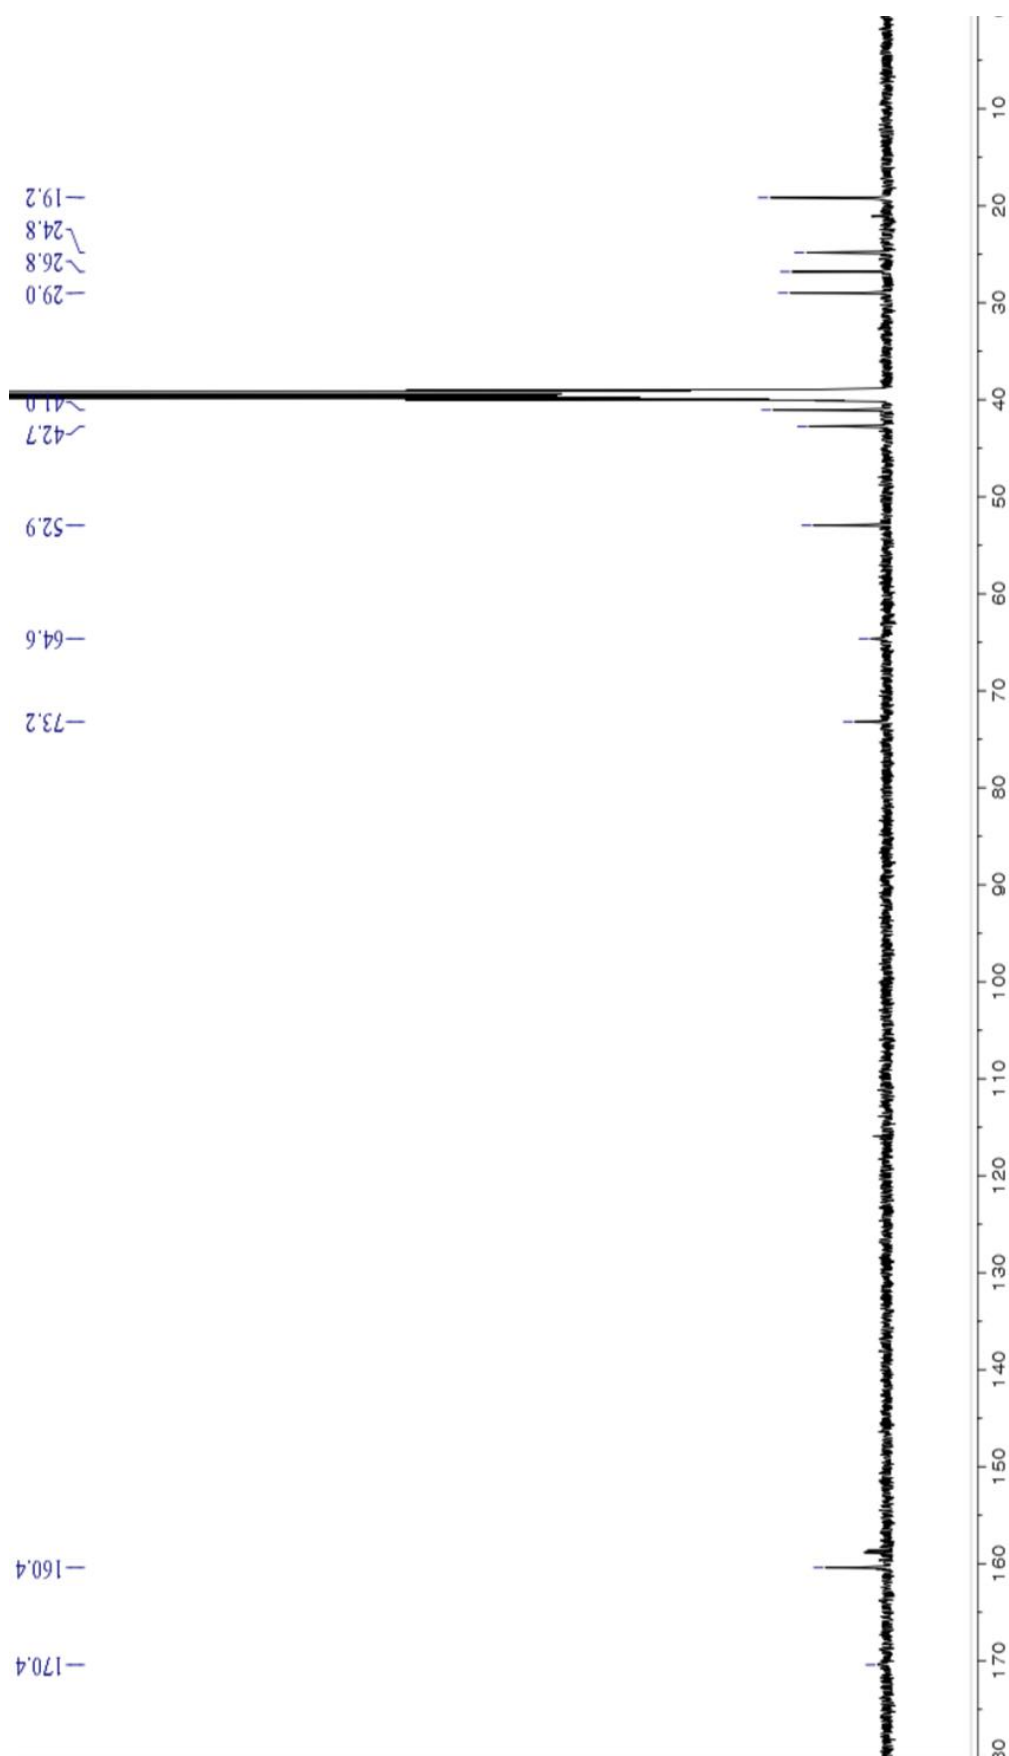

**Figure S13.** The  $^{13}\text{C}$  NMR (150 MHz,  $\text{DMSO-}d_6$ ) spectrum of **3**

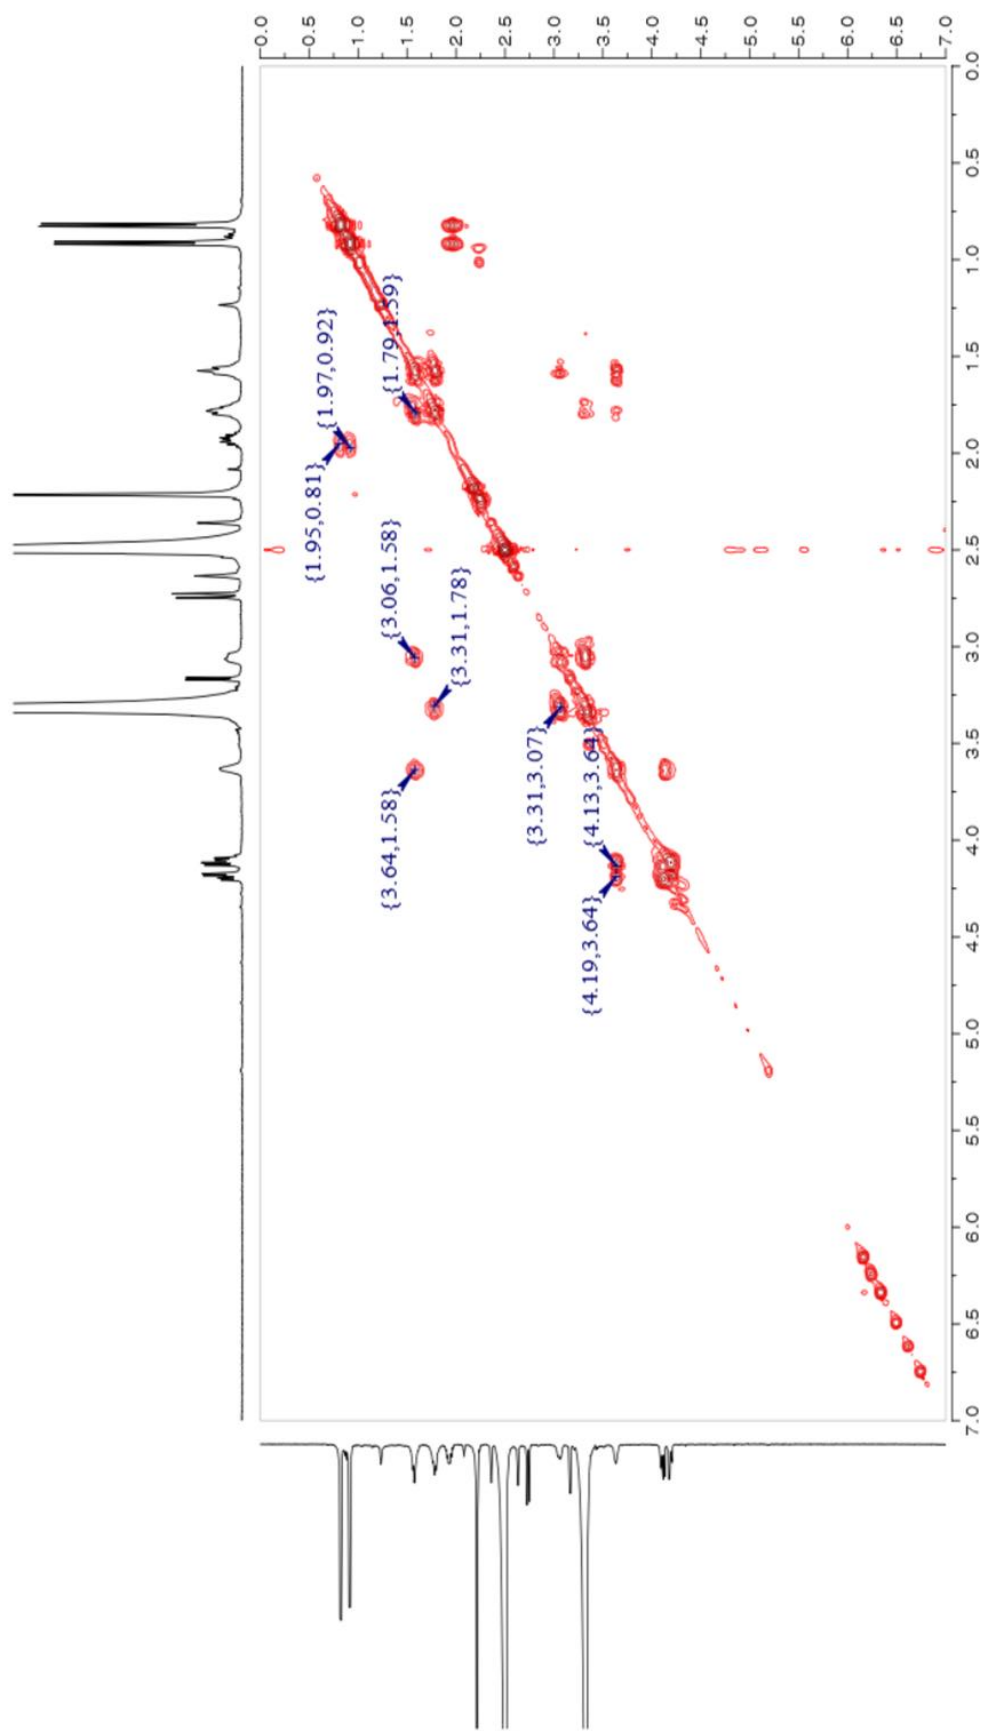

**Figure S14.** The COSY (600 MHz, DMSO- $d_6$ ) spectrum of **3**



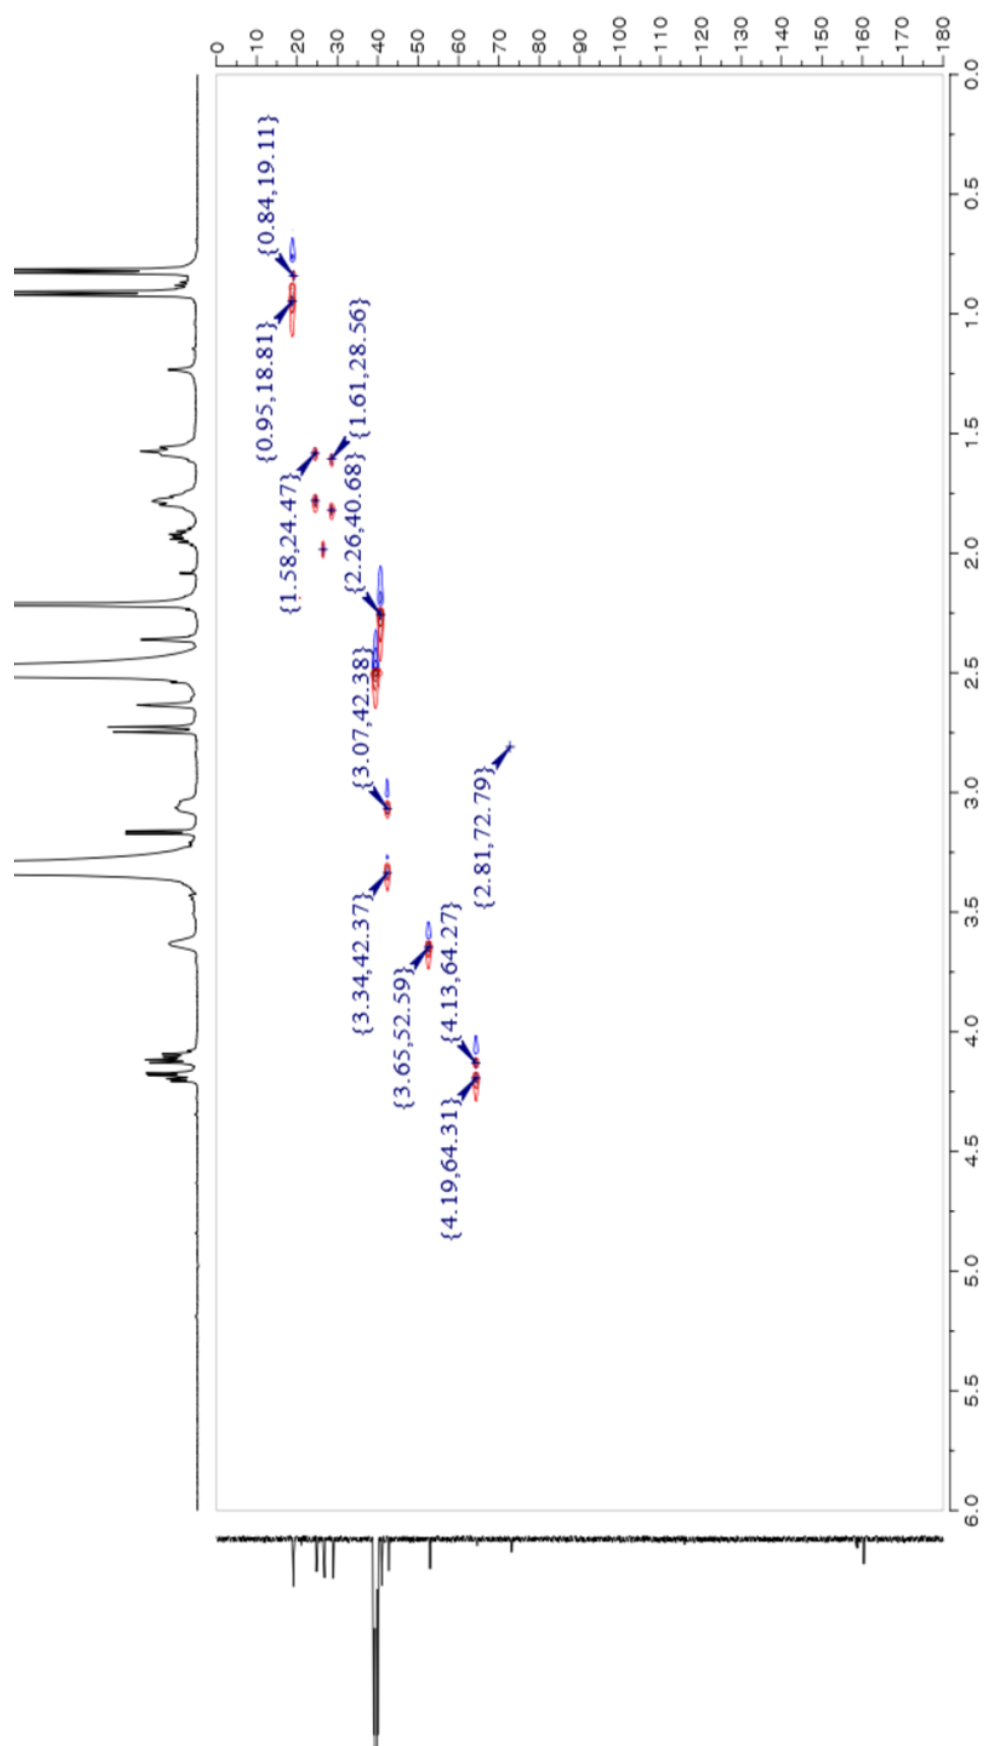

**Figure S15.** The HSQC (600 MHz, DMSO- $d_6$ ) spectrum of **3**

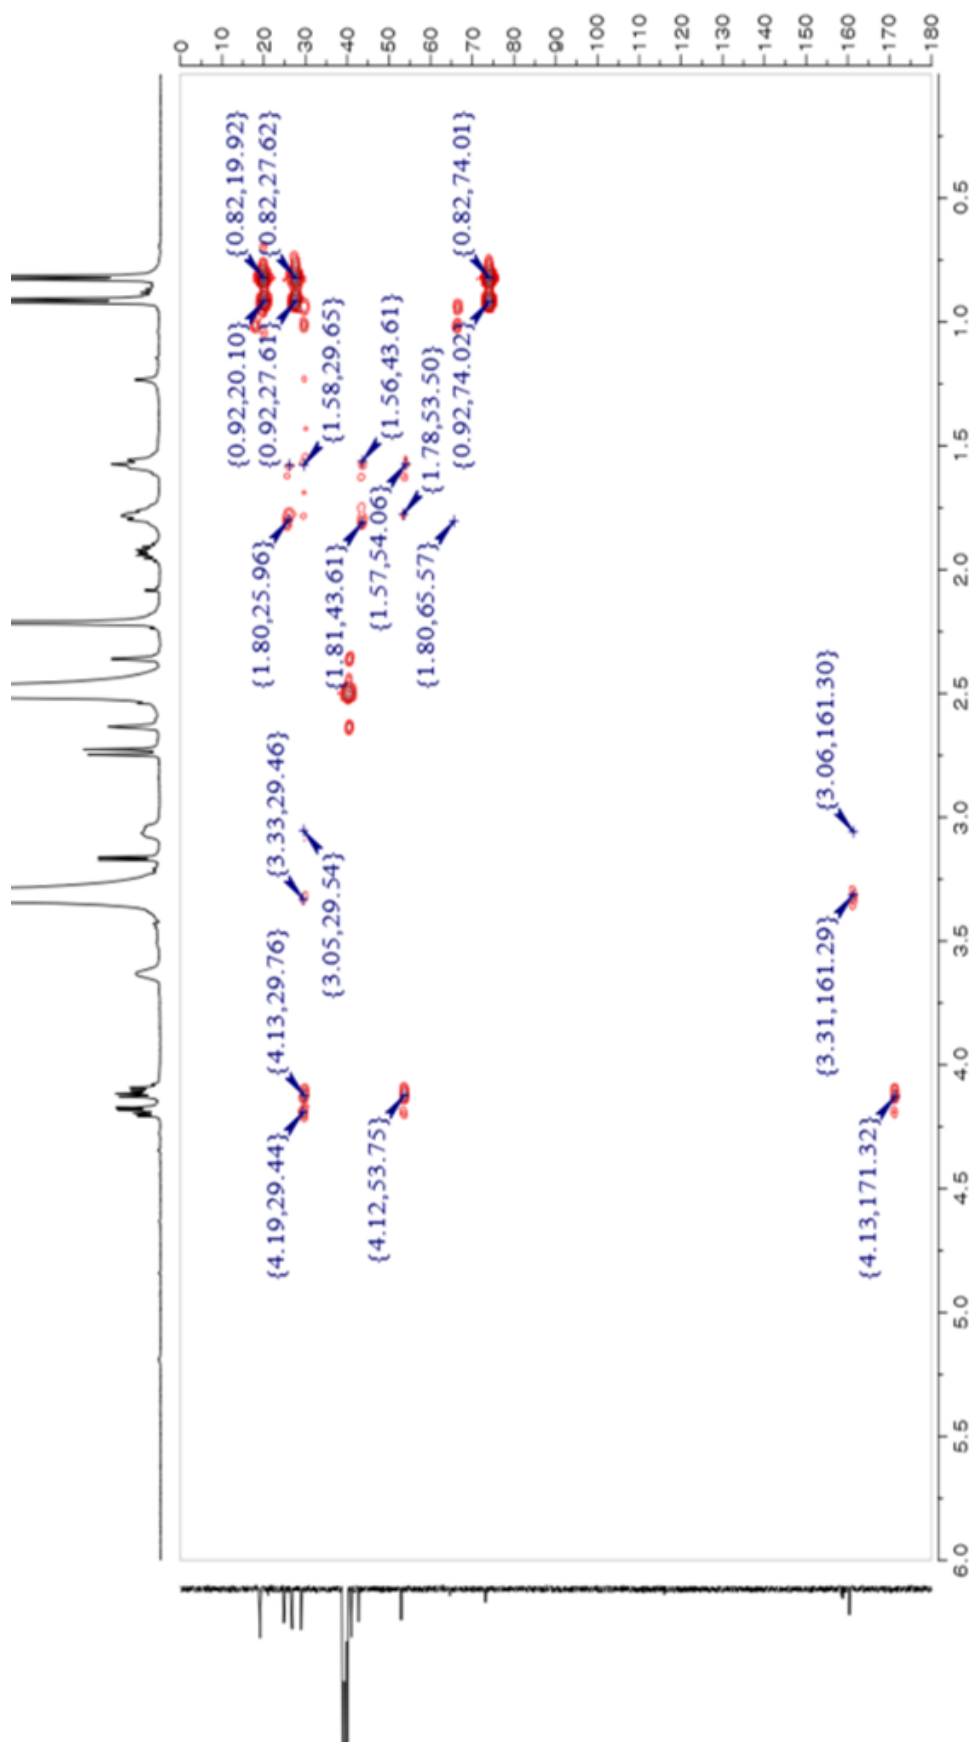

**Figure S16.** The HMBC (600 MHz, DMSO-*d*<sub>6</sub>) spectrum of **3**

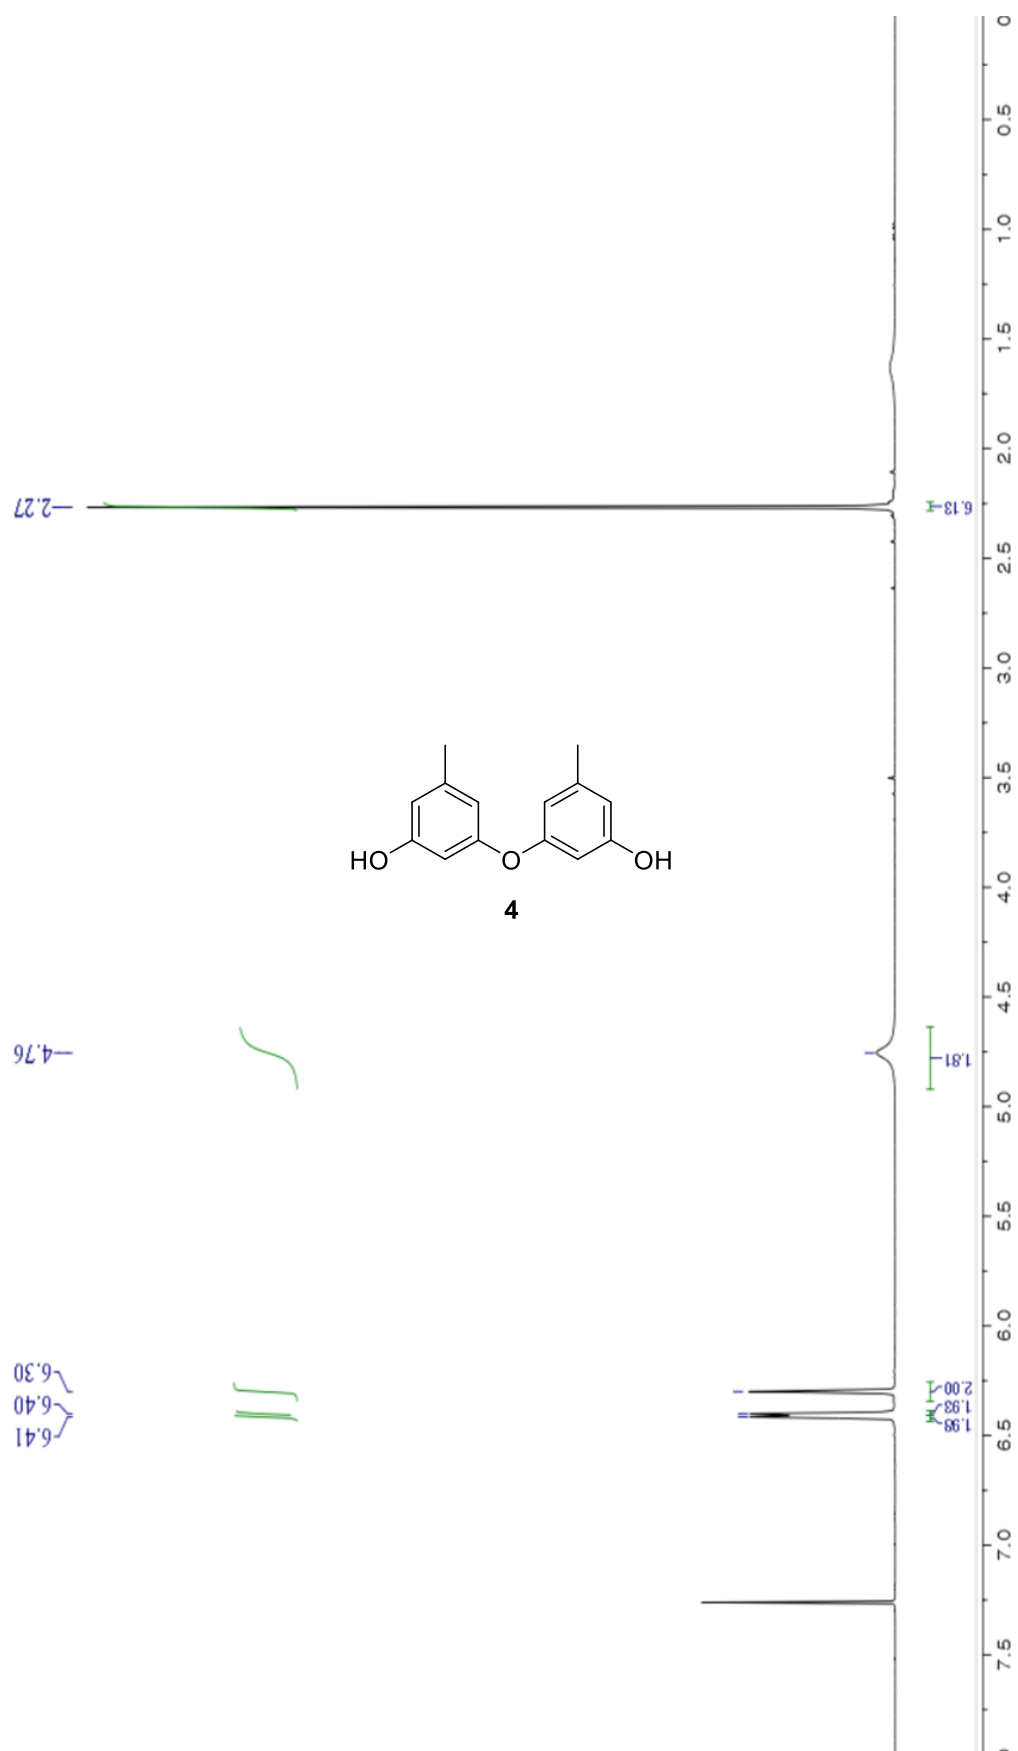

**Figure S17.** The <sup>1</sup>H NMR (400 MHz, CDCl<sub>3</sub>) spectrum of **4**

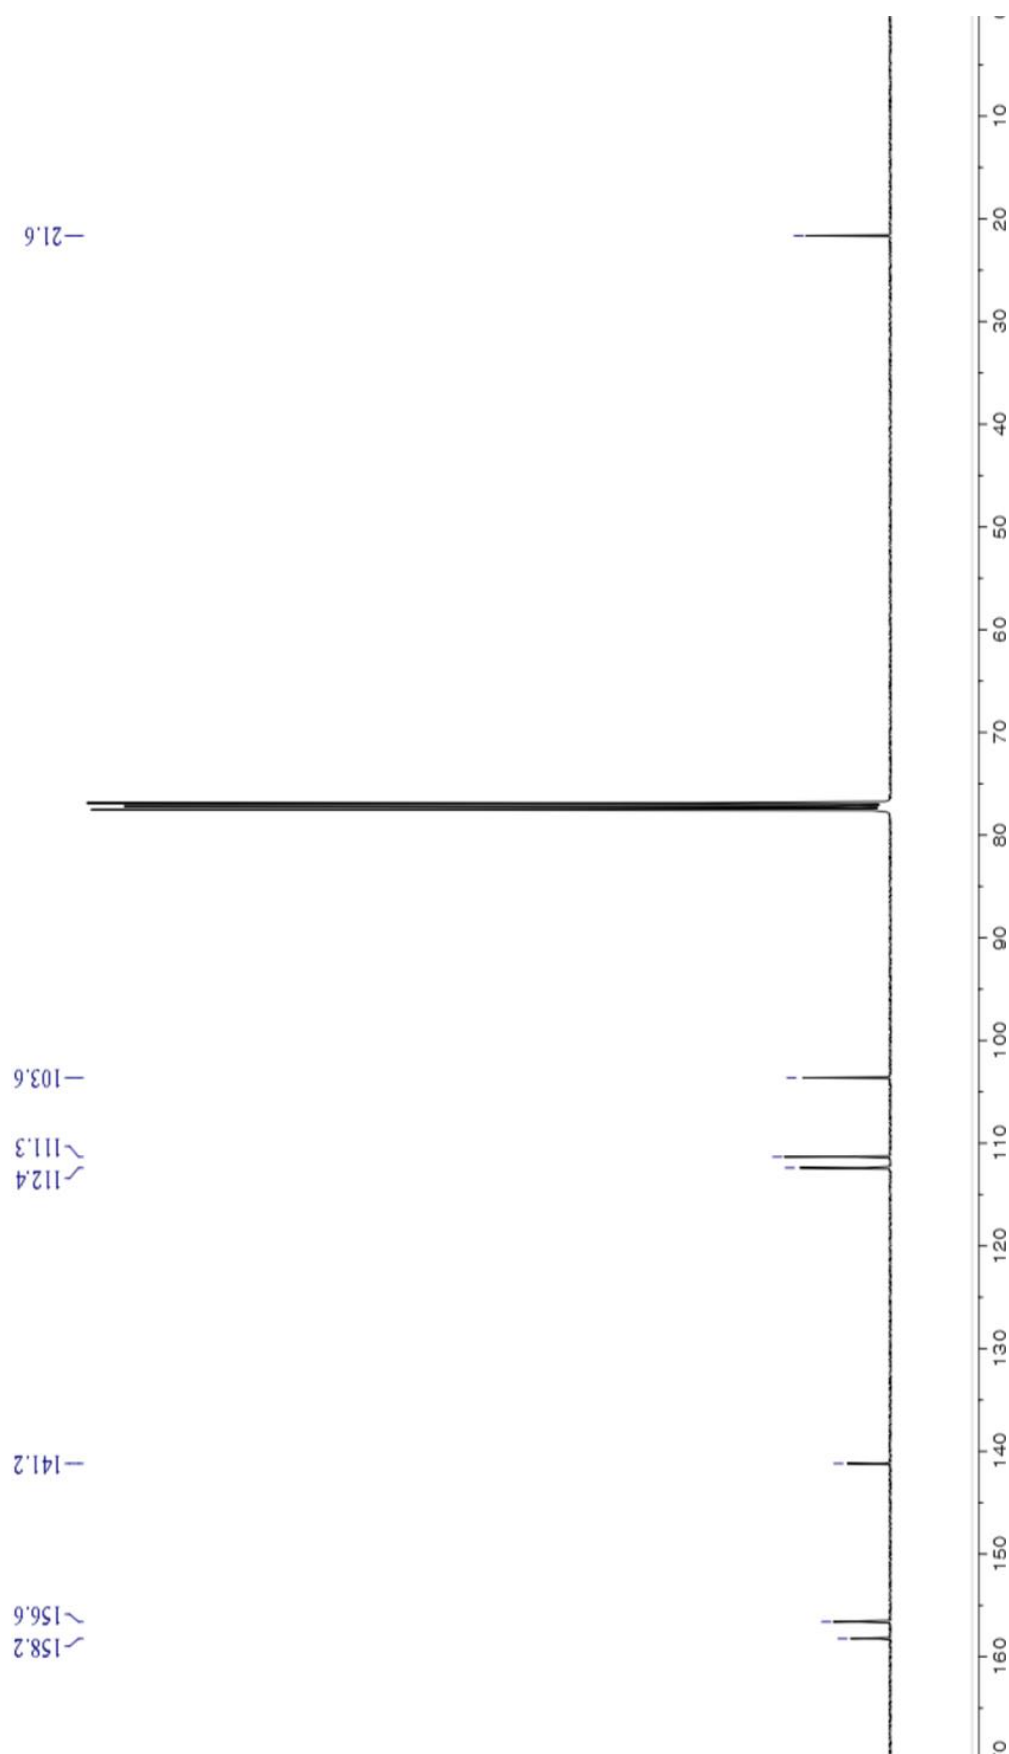

**Figure S18.** The  $^{13}\text{C}$  NMR (100 MHz,  $\text{CDCl}_3$ ) spectrum of **4**

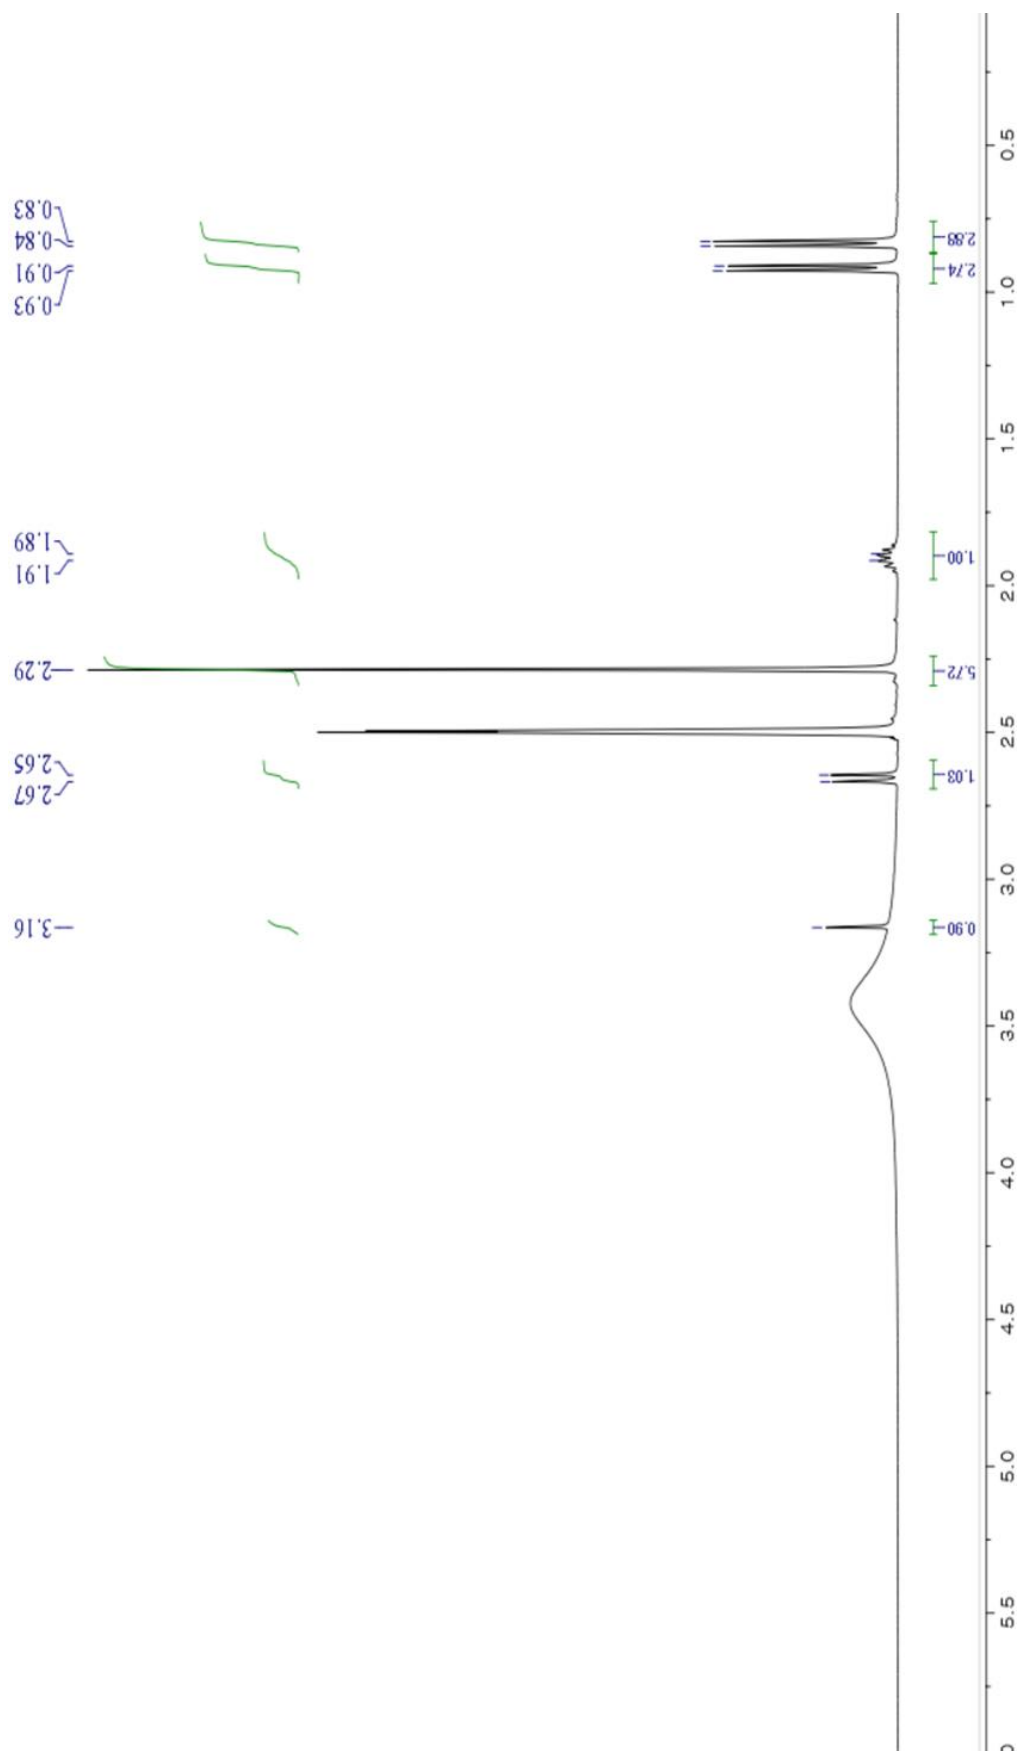

**Figure S19.** The  $^1\text{H}$  NMR (400 MHz,  $\text{DMSO}-d_6$ ) spectrum of **3a**

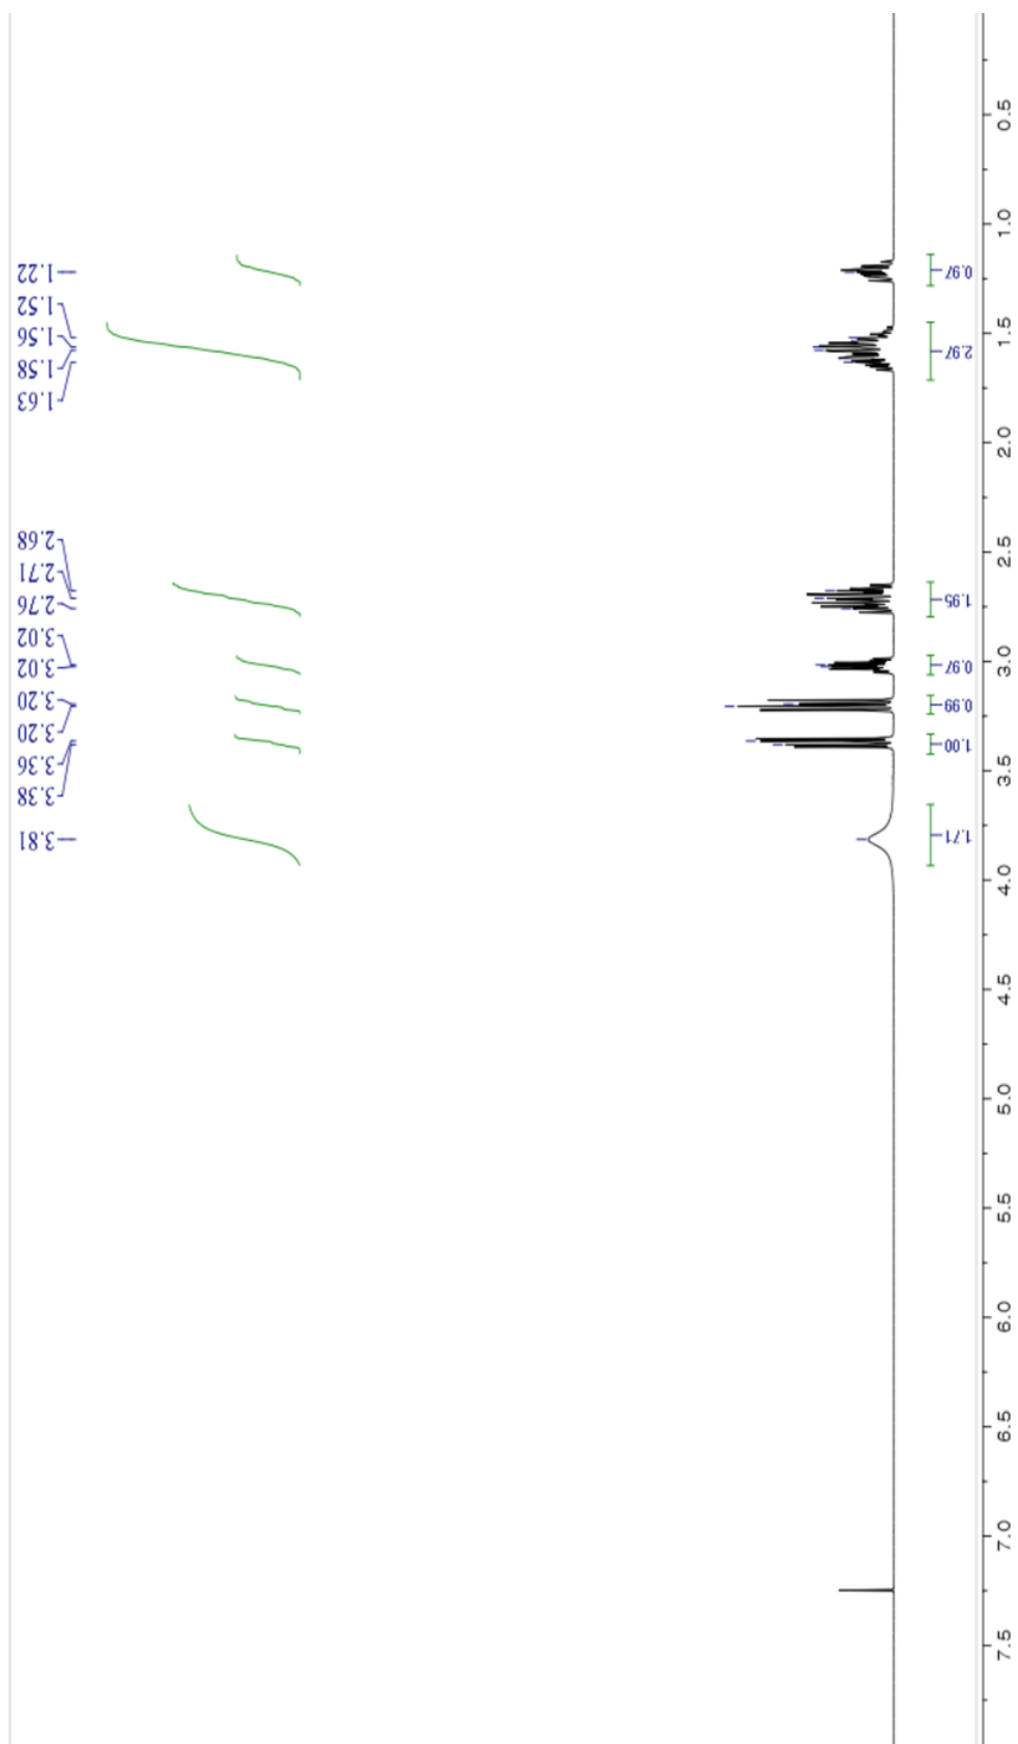

**Figure S20.** The  $^1\text{H}$  NMR (400 MHz,  $\text{CDCl}_3$ ) spectrum of **3b**

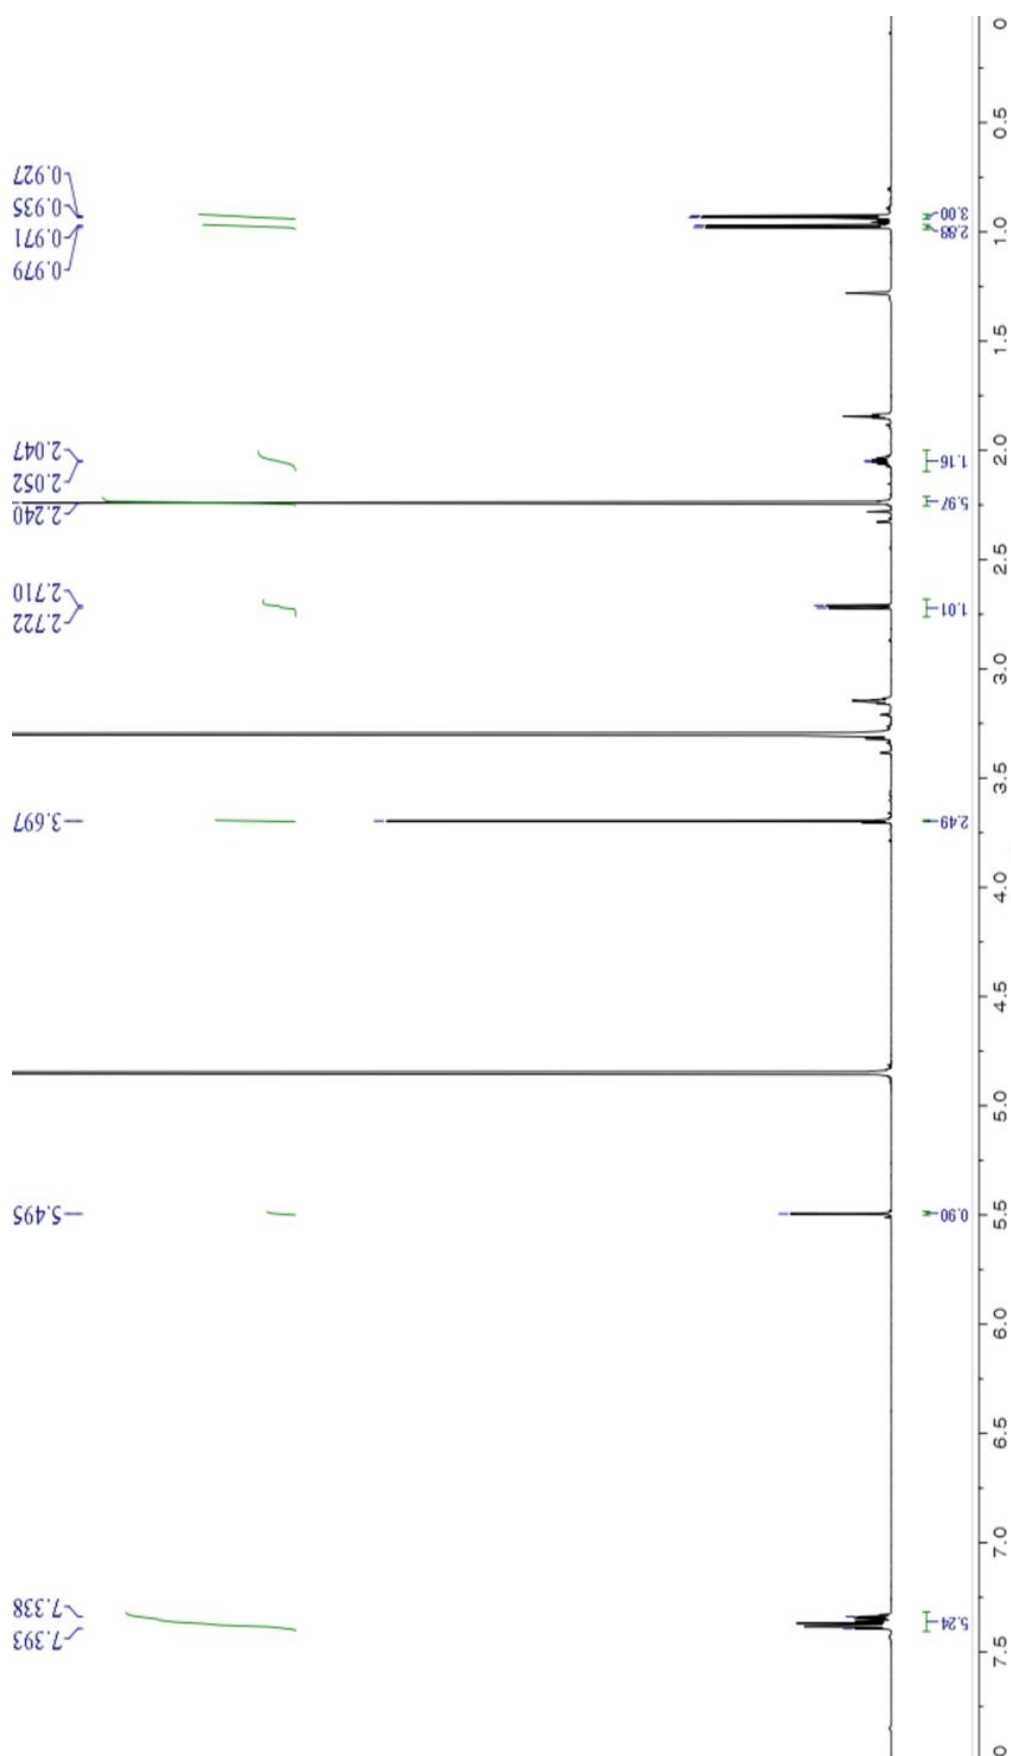

**Figure S21.** The  $^1\text{H}$  NMR (800 MHz,  $\text{Methanol-}d_4$ ) spectrum of **3aS**

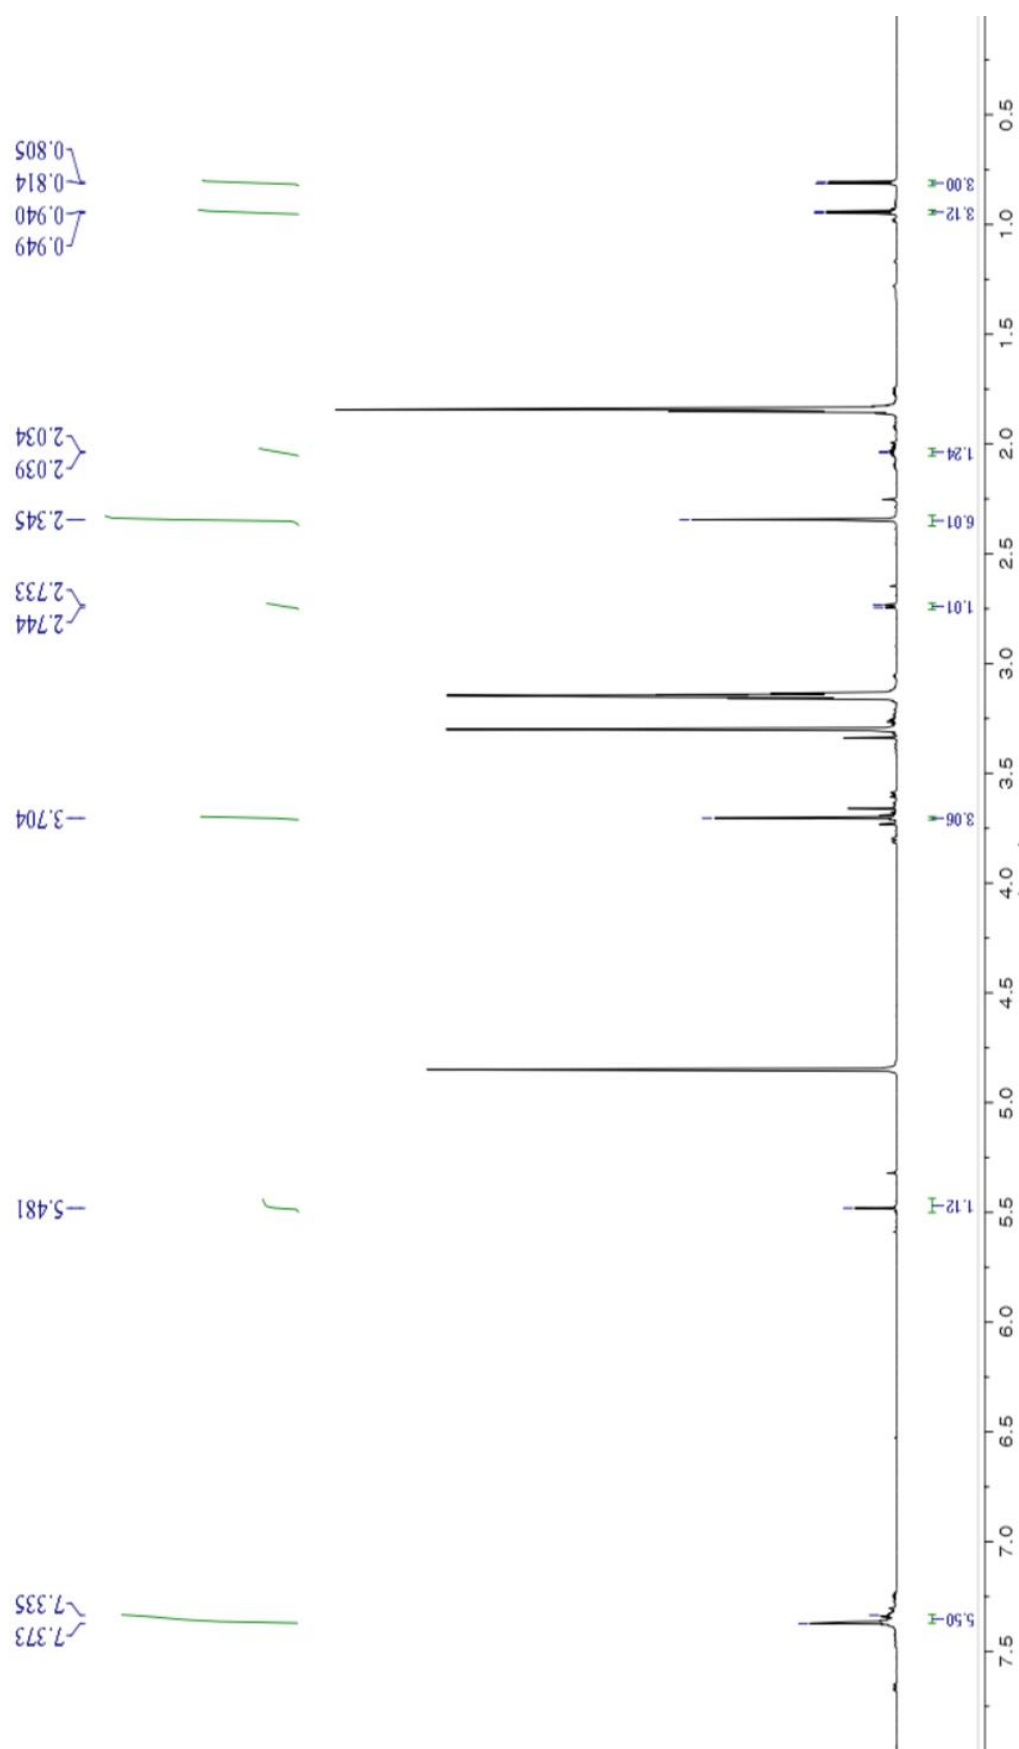

**Figure S22.** The  $^1\text{H}$  NMR (800 MHz,  $\text{Methanol-}d_4$ ) spectrum of **3aR**



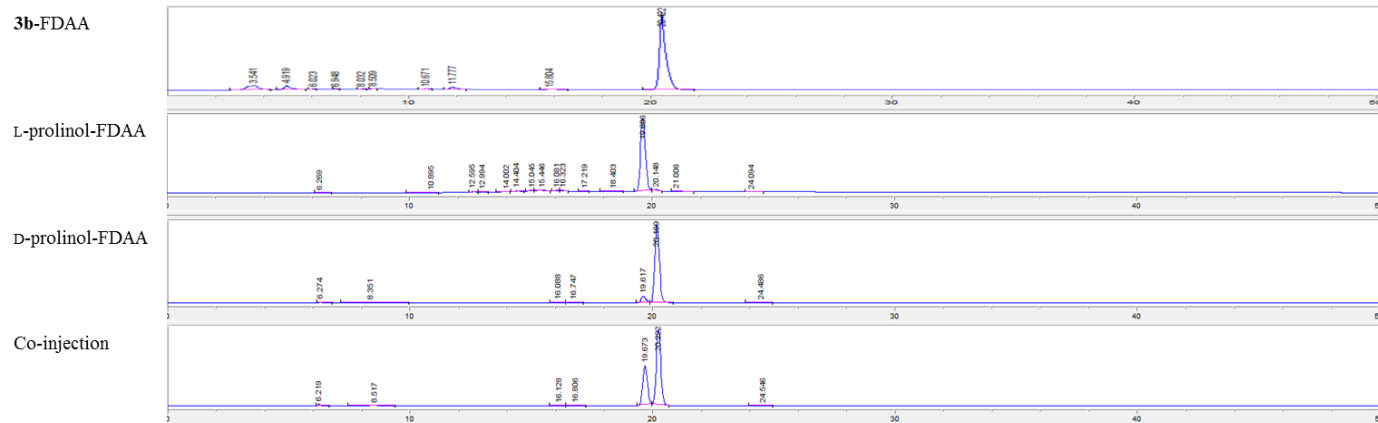

**Figure S23.** The LC/MS chromatogram data of **3b-L-FDAA** adduct

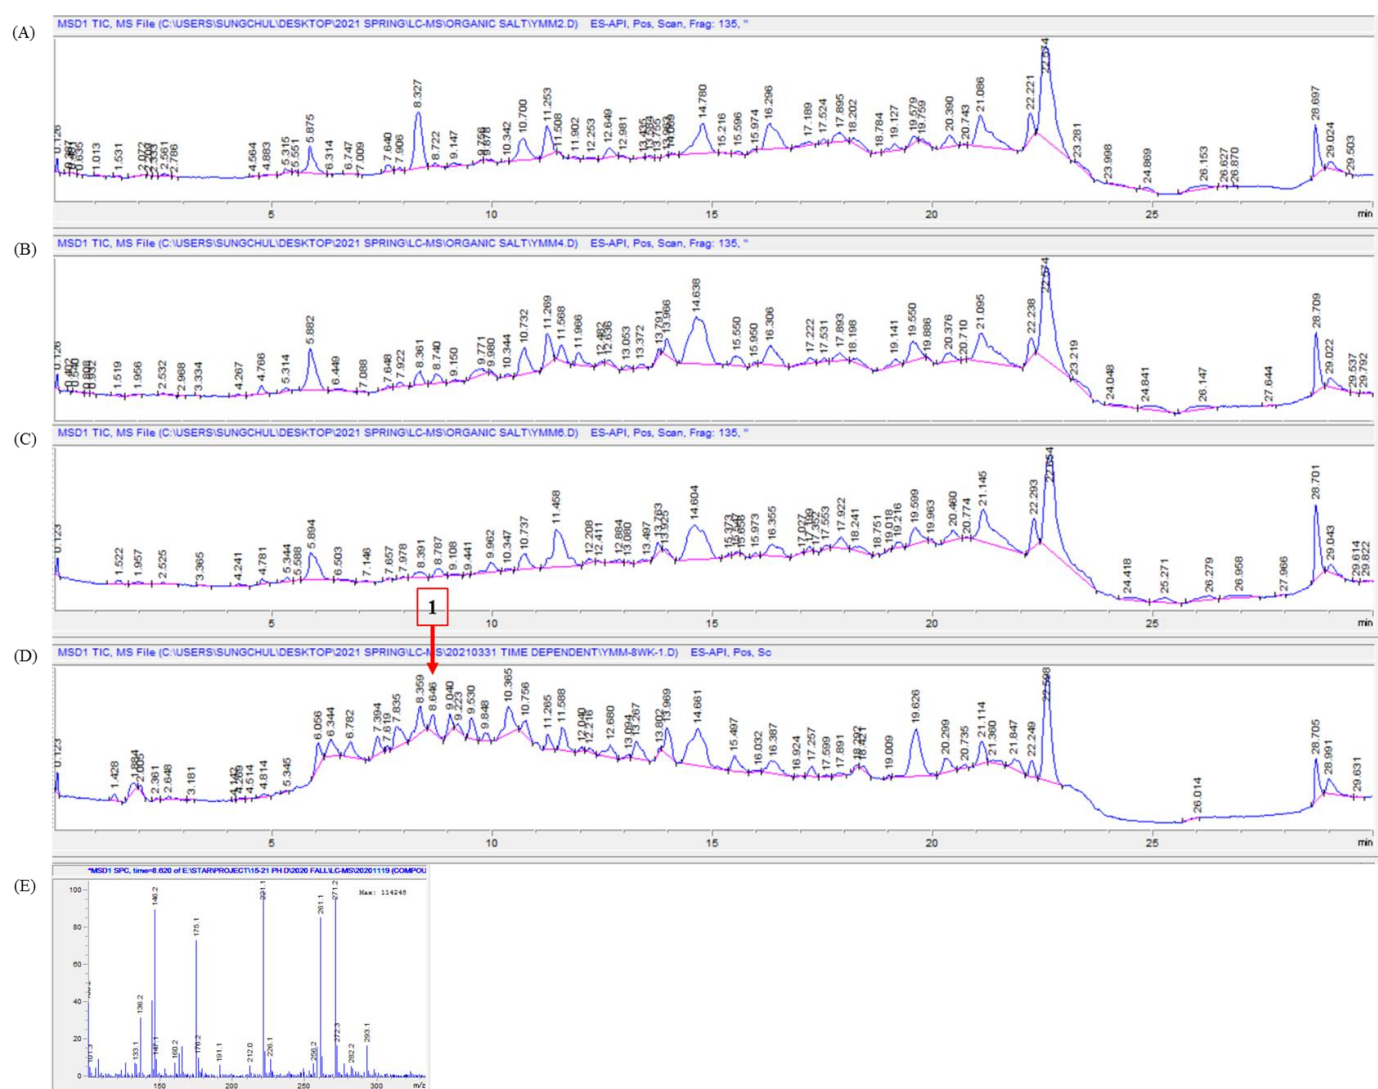

**Figure S24.** The time-scale LC-MS analysis of YMM liquid media extracts. (A)–(D) Extracts from 2, 4, 6, and 8 weeks of incubation, respectively. (E) The MS data on  $t_R = 8.641$ . *Condition:* YMC-ODS-A column, 250 x 4.6 mm; 10–100% MeCN–H<sub>2</sub>O gradient over 20 min with 0.1% trifluoroacetic acid. Compound **1** ( $t_R = 8.646$ ).

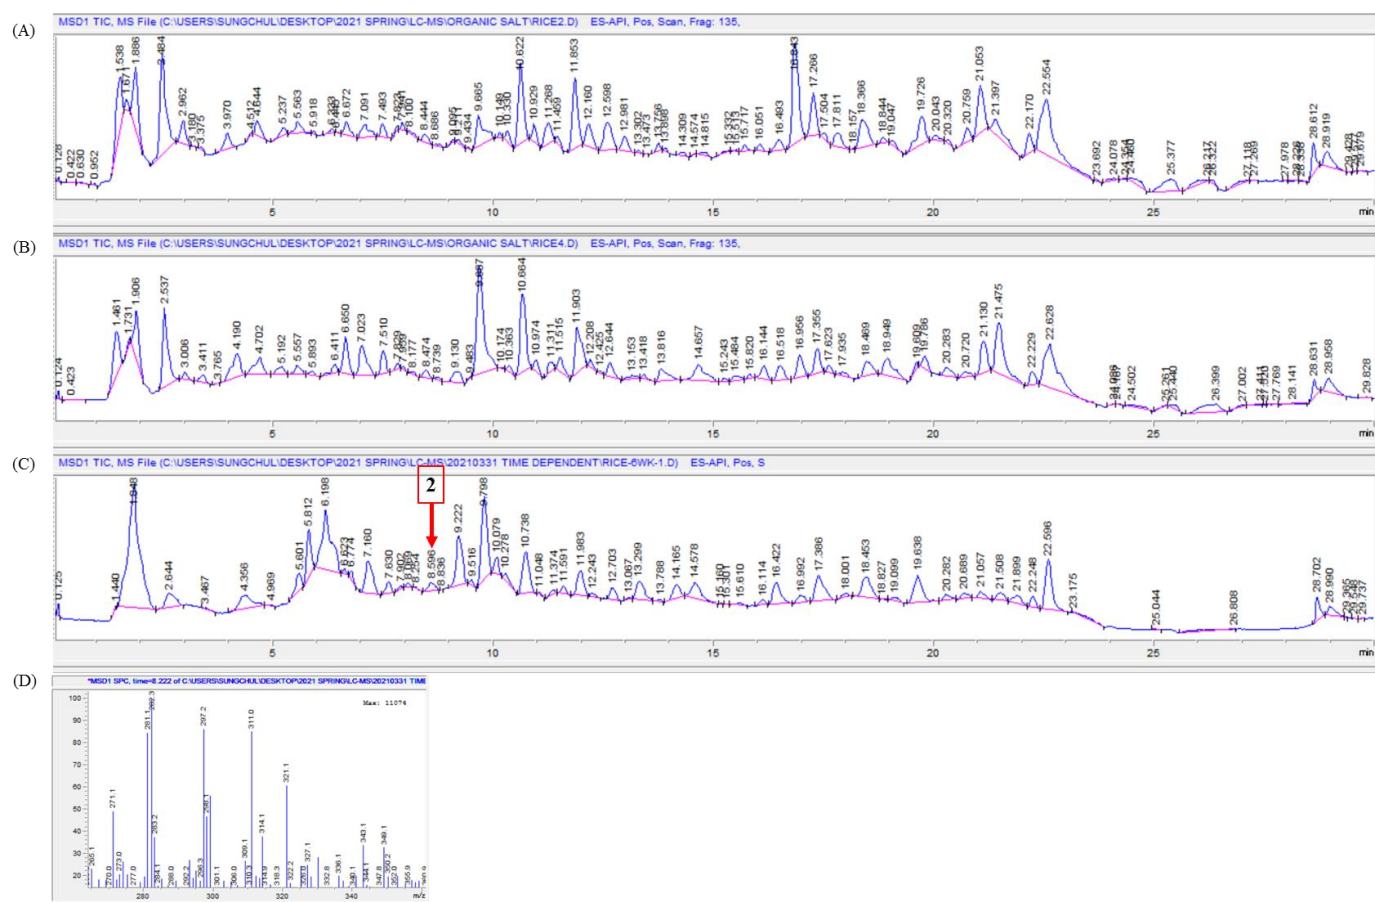

**Figure S25.** The time-scale LC-MS analysis of YMM-rice semi-solid media extracts. (A)–(C) Extracts from 2, 4 and 6 weeks of incubation, respectively. (D) The MS data on  $t_R = 8.596$ . *Condition:* YMC-ODS-A column, 250 x 4.6 mm; 10–100% MeCN–H<sub>2</sub>O gradient over 20 min with 0.1% trifluoroacetic acid. Compound **2** ( $t_R = 8.596$ ).

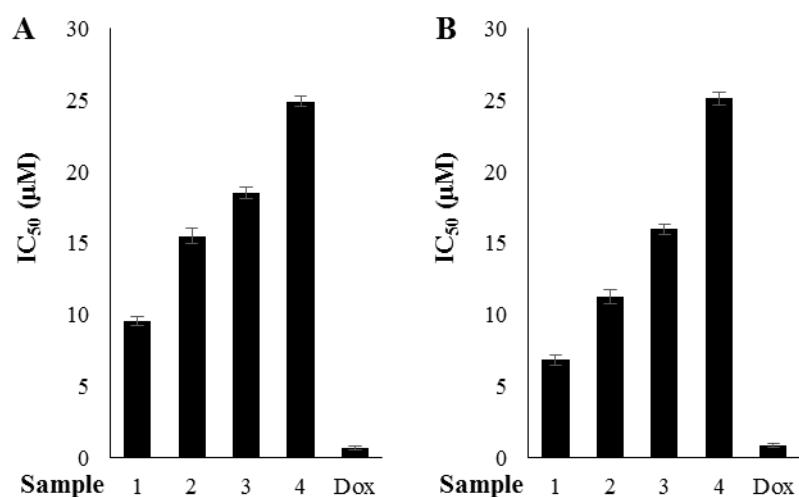

**Figure S26.** The MTT assay against K562 and A549 cancer cells. (A) IC<sub>50</sub> values were calculated by MTT assay results against K562 cancer cell. (B) IC<sub>50</sub> values were calculated by MTT assay results against A549 cancer cell. Doxorubicin was used as a positive control. The values are expressed as the mean  $\pm$  SD of triplicate tests.

**Table S1.** Results of cytotoxicity tests

| Compounds          | IC <sub>50</sub> (μM) |      |
|--------------------|-----------------------|------|
|                    | K562                  | A549 |
| <b>1</b>           | 9.5                   | 6.8  |
| <b>2</b>           | 16                    | 11   |
| <b>3</b>           | 19                    | 16   |
| <b>4</b>           | 25                    | 25   |
| <b>Doxorubicin</b> | 0.72                  | 0.90 |

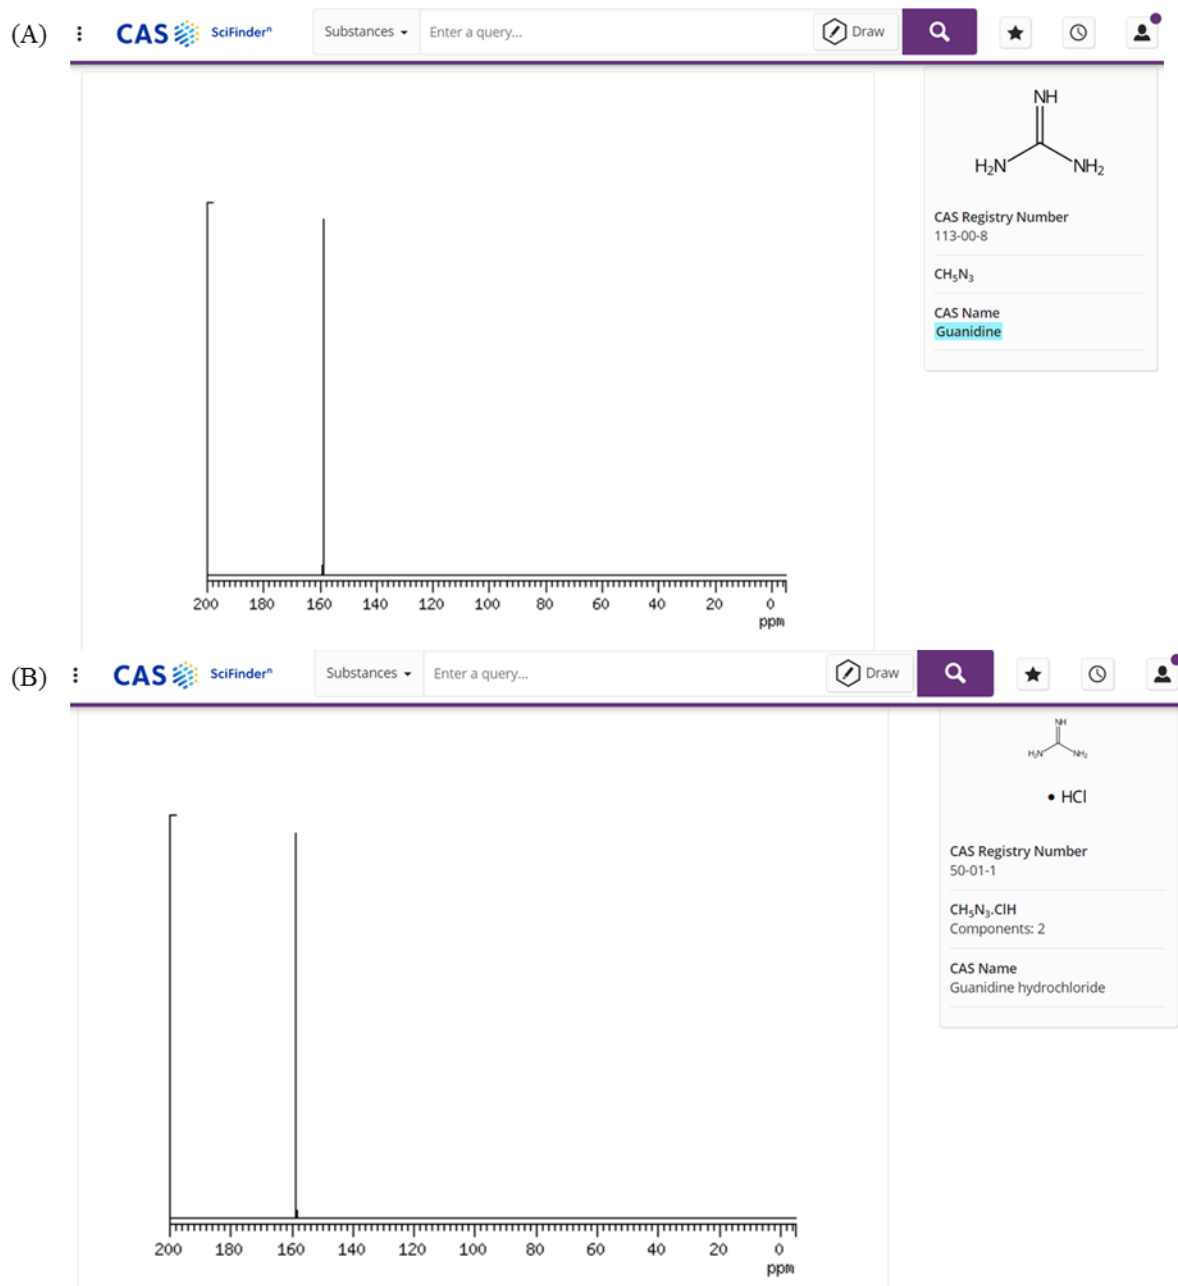

**Figure S27.** The  $^{13}\text{C}$  NMR (25 MHz,  $\text{D}_2\text{O}$ ) spectra of guanidine and guanidine hydrochloride. (A) The  $^{13}\text{C}$  NMR (25 MHz,  $\text{D}_2\text{O}$ ) spectrum of guanidine (CAS 113-00-8). The  $^{13}\text{C}$  NMR (25 MHz,  $\text{D}_2\text{O}$ ) spectrum of guanidine hydrochloride (CAS 50-01-1). The SciFinder provides experimental carbon NMR spectra of both guanidine (CAS 113-00-8) and guanidine hydrochloride (CAS 50-01-1) obtained from the National Institute of Advanced Industrial Science and Technology (Japan).

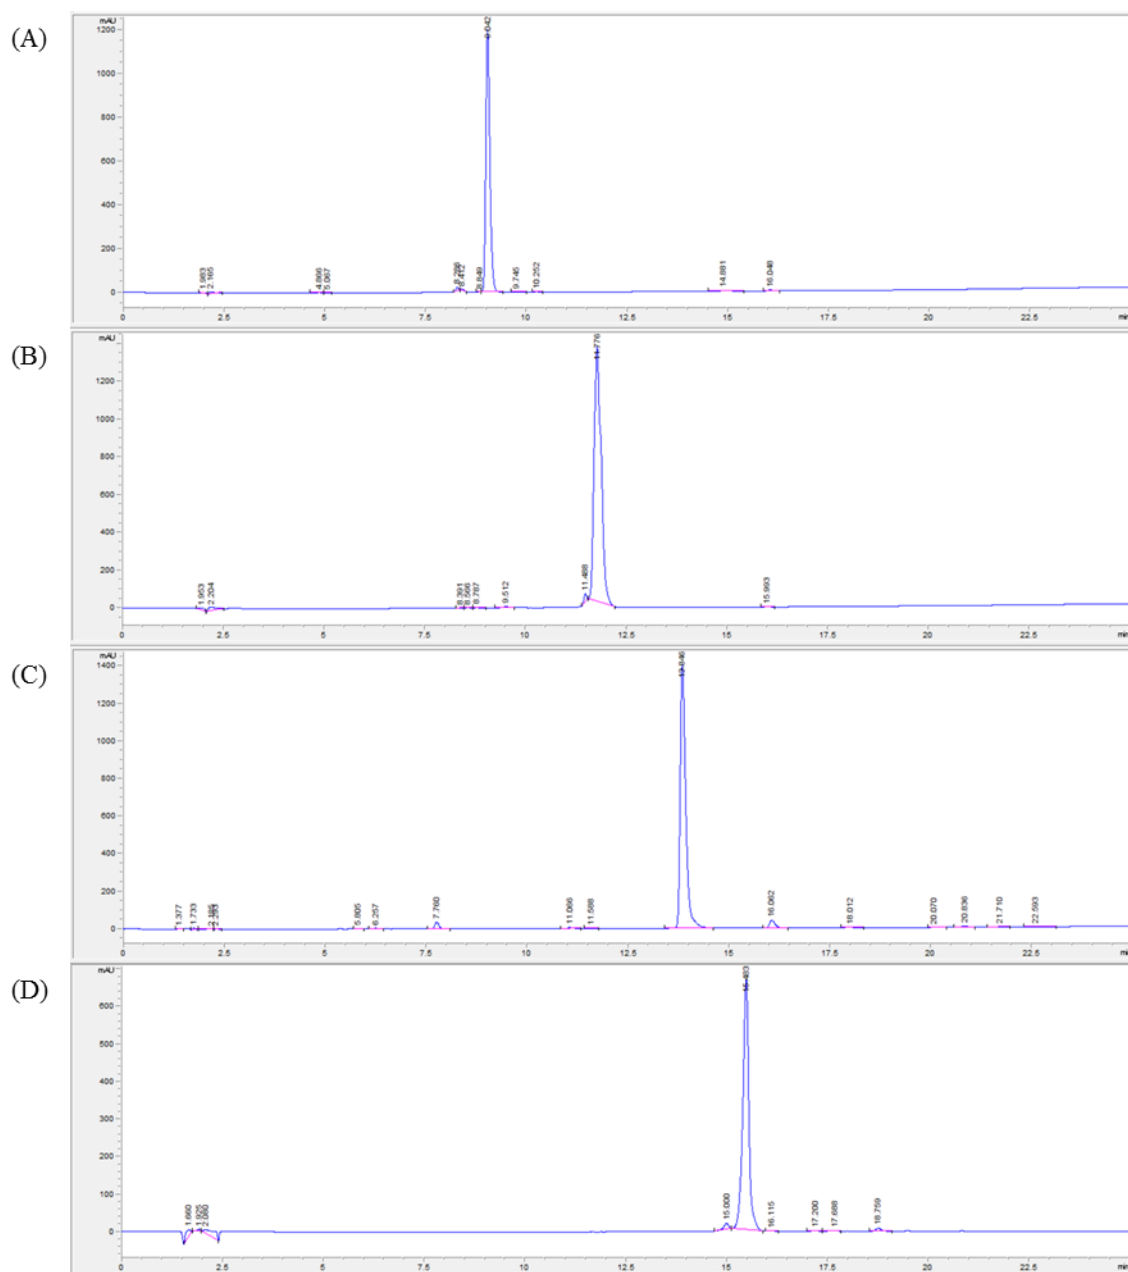

**Figure S28.** The HPLC analysis of **1**. *Condition:* (A) YMC-ODS-A column, 250 x 4.6 mm; 20–100% MeCN–H<sub>2</sub>O gradient over 25 min; 0.5 mL/min; UV detection at 210 nm;  $t_R = 9.042$  min. (B) YMC-ODS-A column, 250 x 4.6 mm; 10–100% MeCN–H<sub>2</sub>O gradient over 25 min; 0.5 mL/min; UV detection at 210 nm;  $t_R = 11.776$  min. (C) YMC-ODS-A column, 250 x 4.6 mm; H<sub>2</sub>O–MeOH, 60:40; 0.5 mL/min; UV detection at 210 nm;  $t_R = 13.846$  min. (D) YMC-ODS-A column, 250 x 4.6 mm; H<sub>2</sub>O–MeCN, 69:31; 0.5 mL/min; UV detection at 210 nm;  $t_R = 15.483$  min.

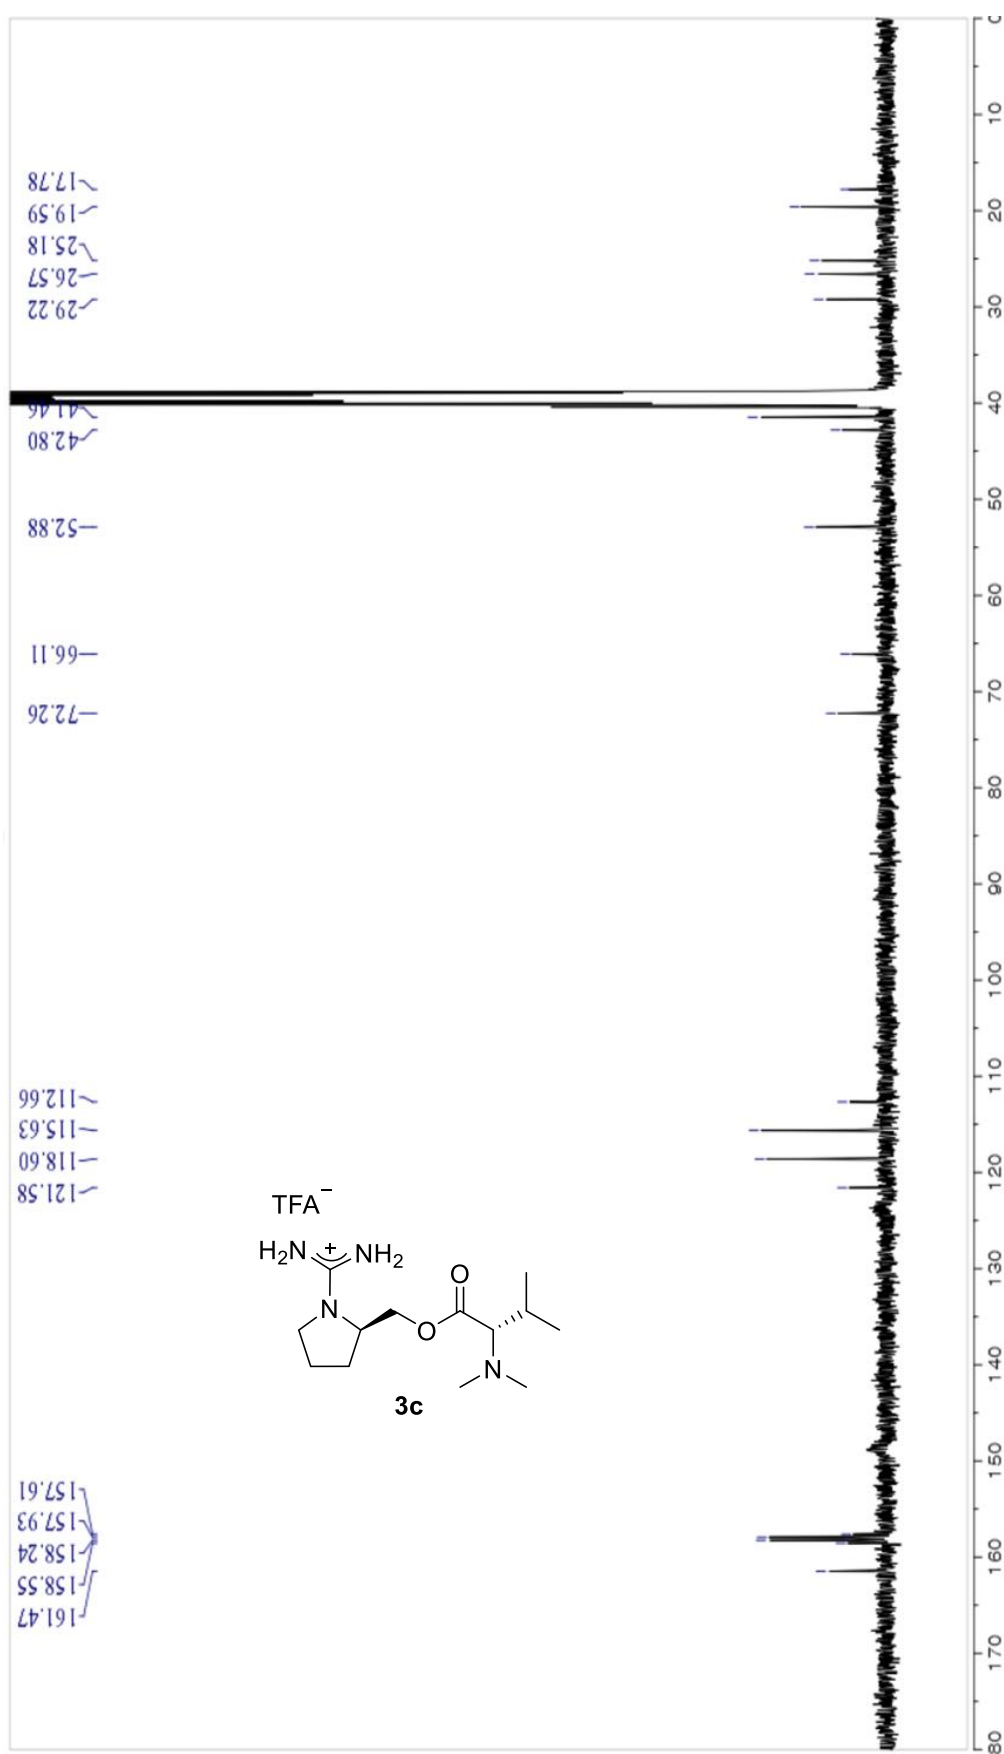

**Figure S29.** The <sup>13</sup>C NMR (100 MHz, DMSO-*d*<sub>6</sub>) spectrum of **3c**

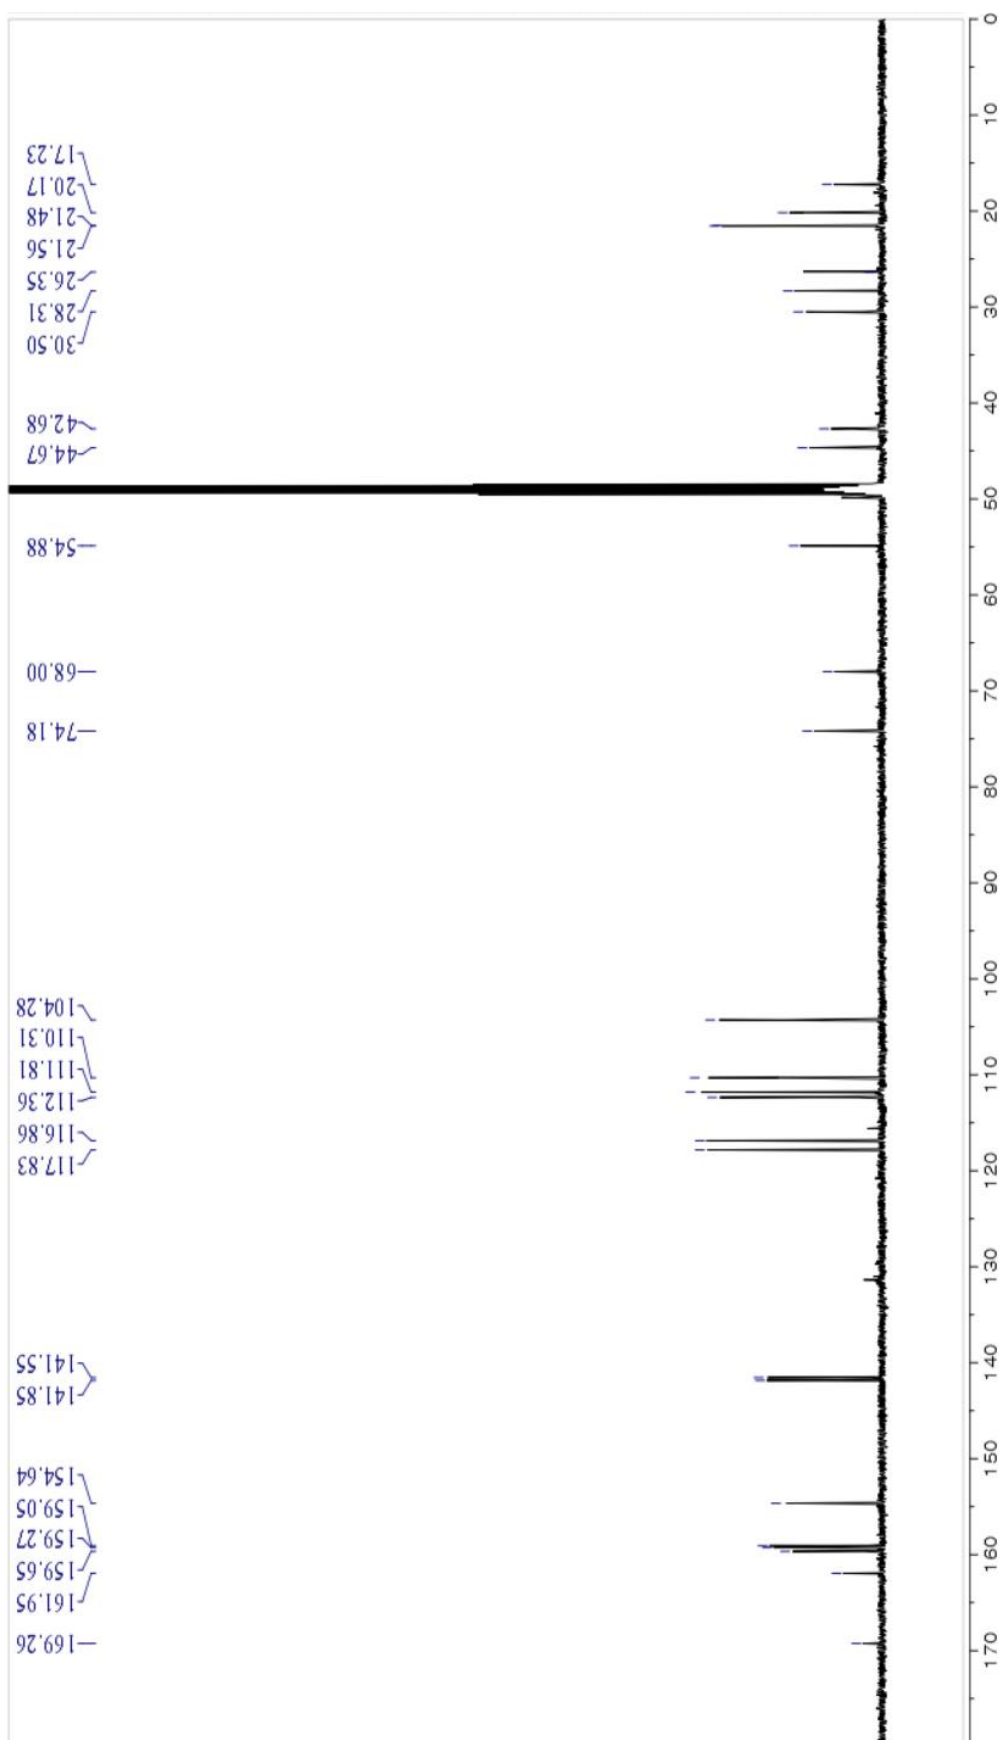

**Figure S30.** The  $^{13}\text{C}$  NMR (125 MHz,  $\text{MeOH-}d_4$ ) spectrum of **1**

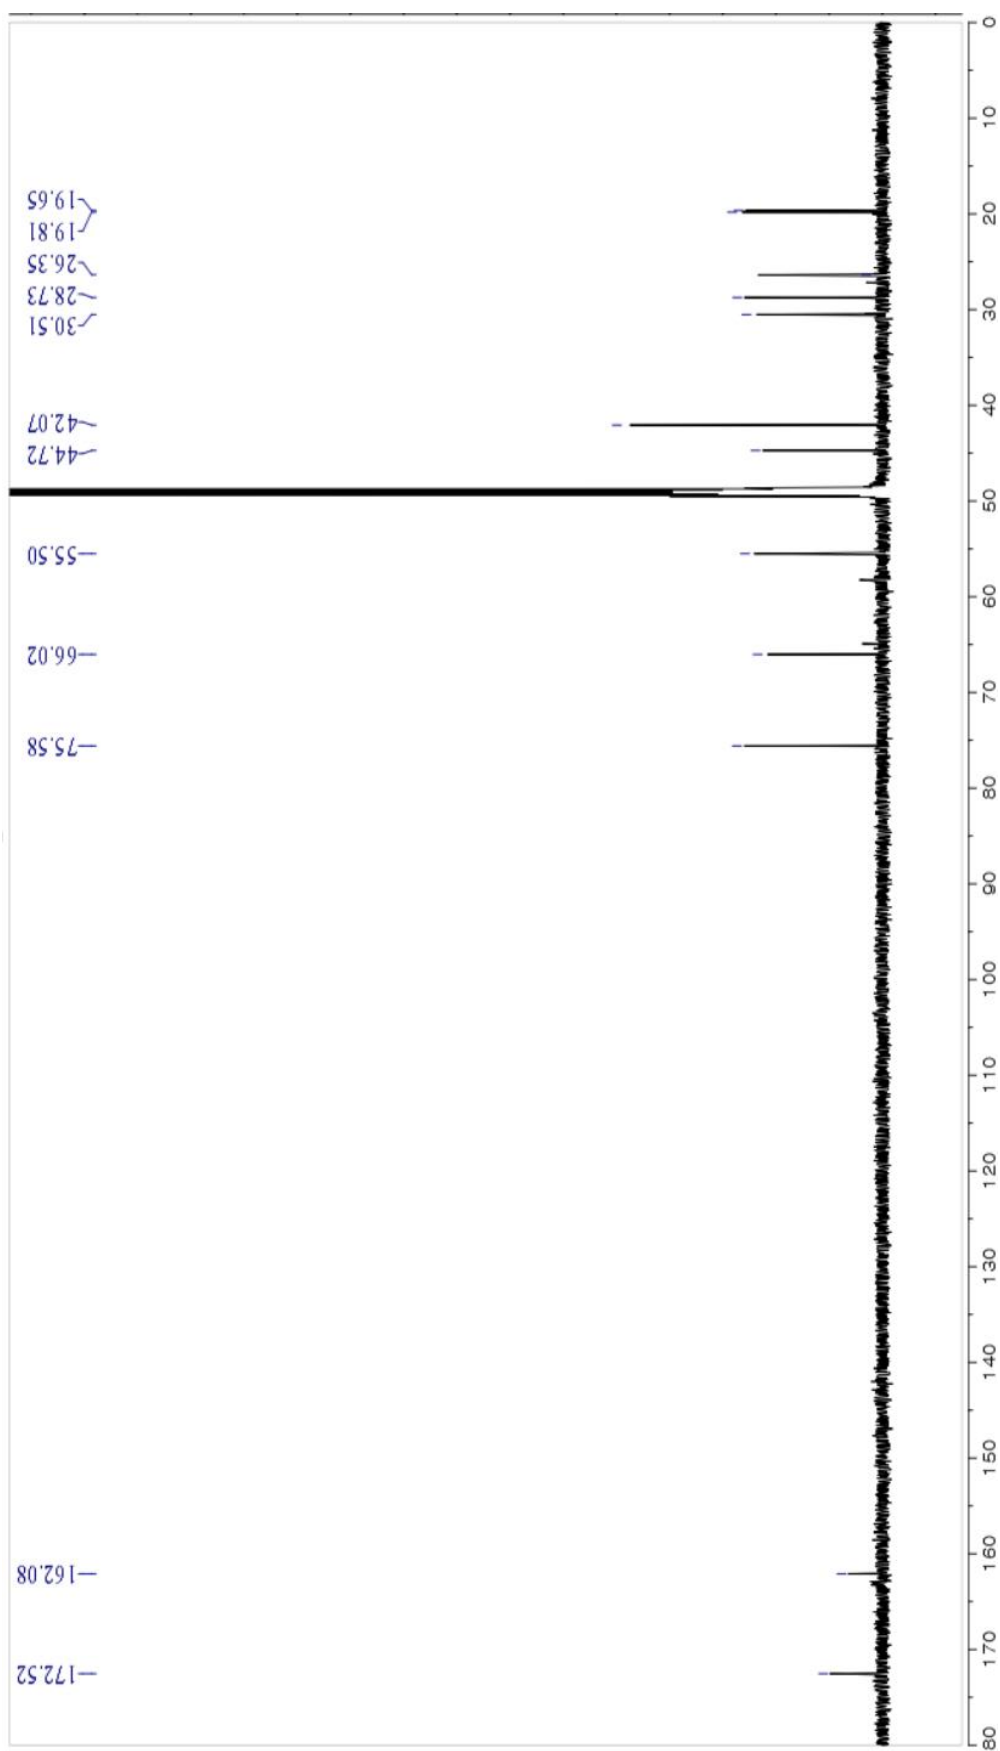

**Figure S31.** The  $^{13}\text{C}$  NMR (200 MHz,  $\text{MeOH-}d_4$ ) spectrum of **3**



**Table S2.** The  $^{13}\text{C}$  NMR data of **1–3** and **3c**

| No  | 1 <sup>a</sup>             | 2 <sup>a</sup>             | 3 <sup>a</sup>             | 3c <sup>a</sup>            | 1 <sup>b</sup>             | 3 <sup>b</sup>             |
|-----|----------------------------|----------------------------|----------------------------|----------------------------|----------------------------|----------------------------|
|     | $\delta_{\text{C}}$ , type |
| 1   | 154.50, C                  | 154.50, C                  |                            |                            | 154.64, C                  |                            |
| 2   | 108.13, CH                 | 108.15, CH                 |                            |                            | 110.31, CH                 |                            |
| 3   | 156.65, C                  | 156.69, C                  |                            |                            | 154.64, C                  |                            |
| 4   | 113.93, CH                 | 113.89, CH                 |                            |                            | 116.86, CH                 |                            |
| 5   | 139.28, C                  | 139.34, C                  |                            |                            | 141.55, C                  |                            |
| 6   | 115.83, CH                 | 115.95, CH                 |                            |                            | 117.83, CH                 |                            |
| 7   | 157.59, C                  | 157.60, C                  |                            |                            | 159.05, C                  |                            |
| 8   | 102.74, CH                 | 102.79, CH                 |                            |                            | 104.28, CH                 |                            |
| 9   | 158.43, C                  | 158.47, C                  |                            |                            | 159.27, C                  |                            |
| 10  | 109.82, CH                 | 109.85, CH                 |                            |                            | 111.81, CH                 |                            |
| 11  | 140.05, C                  | 140.10, C                  |                            |                            | 141.85, C                  |                            |
| 12  | 111.15, CH                 | 111.21, CH                 |                            |                            | 112.36, CH                 |                            |
| 13  | 21.02, CH <sub>3</sub>     | 21.13, CH <sub>3</sub>     |                            |                            | 21.48, CH <sub>3</sub>     |                            |
| 14  | 21.09, CH <sub>3</sub>     | 21.06, CH <sub>3</sub>     |                            |                            | 21.56, CH <sub>3</sub>     |                            |
| 1'  | 42.67, CH <sub>2</sub>     |                            | 42.74, CH <sub>2</sub>     | 42.80, CH <sub>2</sub>     | 44.67, CH <sub>2</sub>     | 44.72, CH <sub>2</sub>     |
| 2'  | 24.78, CH <sub>2</sub>     |                            | 24.82, CH <sub>2</sub>     | 25.18, CH <sub>2</sub>     | 26.35, CH <sub>2</sub>     | 26.35, CH <sub>2</sub>     |
| 3'  | 28.96, CH <sub>2</sub>     |                            | 28.98, CH <sub>2</sub>     | 29.22, CH <sub>2</sub>     | 30.50, CH <sub>2</sub>     | 30.51, CH <sub>2</sub>     |
| 4'  | 52.98, CH                  |                            | 52.95, CH                  | 52.88, CH                  | 54.88, CH                  | 55.50, CH                  |
| 5'  | 64.45, CH <sub>2</sub>     |                            | 64.64, CH <sub>2</sub>     | 66.11, CH <sub>2</sub>     | 68.00, CH <sub>2</sub>     | 66.02, CH <sub>2</sub>     |
| 6'  | 170.53, C                  |                            | 170.37, C                  | ND                         | 169.26, C                  | 172.52, C                  |
| 7'  | 73.31, CH                  |                            | 73.19, CH                  | 72.26, CH                  | 74.18, CH                  | 75.58, CH                  |
| 8'  | 26.84, CH                  |                            | 26.80, CH                  | 26.57, CH                  | 28.31, CH                  | 28.73, CH                  |
| 9'  | 19.13, CH <sub>3</sub>     |                            | 19.16, CH <sub>3</sub>     | 17.78, CH <sub>3</sub>     | 17.23, CH <sub>3</sub>     | 19.65, CH <sub>3</sub>     |
| 10' | 19.51, CH <sub>3</sub>     |                            | 19.16, CH <sub>3</sub>     | 19.57, CH <sub>3</sub>     | 20.17, CH <sub>3</sub>     | 19.81, CH <sub>3</sub>     |
| 11' | 41.01, CH <sub>3</sub>     |                            | 41.05, CH <sub>3</sub>     | 41.46, CH <sub>3</sub>     | 42.68, CH <sub>3</sub>     | 42.07, CH <sub>3</sub>     |
| 12' | 41.01, CH <sub>3</sub>     |                            | 41.05, CH <sub>3</sub>     | 41.46, CH <sub>3</sub>     | 42.68, CH <sub>3</sub>     | 42.07, CH <sub>3</sub>     |
| 13' | 160.24, C                  |                            | 160.39, C                  | 161.47, C                  | 161.95, C                  | 162.08, C                  |

<sup>a</sup> Data were obtained in DMSO-*d*<sub>6</sub>. <sup>b</sup> Data were obtained in MeOH-*d*<sub>4</sub>.
